# Supplementary material for: Integrating culturally informed approaches into physiotherapy assessment and treatment of chronic pain: a pilot randomised controlled trial
Source: PubMed Central journal article supplement — BMJ Open. 2018 Jul 5;8(7):e021999. doi: 10.1136/bmjopen-2018-021999 (PMC6042550; doi:10.1136/bmjopen-2018-021999), 2018-07-05
Supplement: bmjopen-2018-021999.draft_revisions.pdf [file bmjopen-2018-021999.draft_revisions.pdf]

# BMJ Open

BMJ Open is committed to open peer review. As part of this commitment we make the peer review history of every article we publish publicly available.

When an article is published we post the peer reviewers' comments and the authors' responses online. We also post the versions of the paper that were used during peer review. These are the versions that the peer review comments apply to.

The versions of the paper that follow are the versions that were submitted during the peer review process. They are not the versions of record or the final published versions. They should not be cited or distributed as the published version of this manuscript.

BMJ Open is an open access journal and the full, final, typeset and author-corrected version of record of the manuscript is available on our site with no access controls, subscription charges or pay-per-view fees (<http://bmjopen.bmj.com>).

If you have any questions on BMJ Open's open peer review process please email [info.bmjopen@bmj.com](mailto:info.bmjopen@bmj.com)

# BMJ Open

## Integrating culturally informed approaches into physiotherapy assessment and treatment of chronic pain: a pilot randomised controlled trial

|                               |                                                                                                                                                                                                                                                                                                                                                                                                |
|-------------------------------|------------------------------------------------------------------------------------------------------------------------------------------------------------------------------------------------------------------------------------------------------------------------------------------------------------------------------------------------------------------------------------------------|
| Journal:                      | <i>BMJ Open</i>                                                                                                                                                                                                                                                                                                                                                                                |
| Manuscript ID                 | bmjopen-2018-021999                                                                                                                                                                                                                                                                                                                                                                            |
| Article Type:                 | Research                                                                                                                                                                                                                                                                                                                                                                                       |
| Date Submitted by the Author: | 29-Jan-2018                                                                                                                                                                                                                                                                                                                                                                                    |
| Complete List of Authors:     | Brady, Bernadette; Liverpool Hospital, Departments of Pain Medicine and Physiotherapy; Western Sydney University School of Science and Health, Veljanova, Irena; Western Sydney University, School of Social Science and Psychology<br>Schabrun, Siobhan; Western Sydney University School of Science and Health<br>Chipchase, Lucinda; Western Sydney University School of Science and Health |
| Keywords:                     | Cultural diversity, chronic pain, Physical Therapy Speciality, Cultural competency                                                                                                                                                                                                                                                                                                             |
|                               |                                                                                                                                                                                                                                                                                                                                                                                                |

SCHOLARONE™  
Manuscripts

1  
2  
3  
4  
5  
6  
7  
8  
9  
10  
11  
12  
13  
14  
15  
16  
17  
18  
19  
20  
21  
22  
23  
24  
25  
26  
27  
28  
29  
30  
31  
32  
33  
34  
35  
36  
37  
38  
39  
40  
41  
42  
43  
44  
45  
46  
47  
48  
49  
50  
51  
52  
53  
54  
55  
56  
57  
58  
59  
60

1 Title: Integrating culturally informed approaches into physiotherapy assessment and  
2 treatment of chronic pain: a pilot randomised controlled trial

3  
4 Authors:

5 Bernadette Brady<sup>1,2</sup>, Irena Veljanova<sup>3</sup>, Siobhan Schabrun<sup>1</sup>, Lucy Chipchase<sup>1</sup>.

6  
7 Affiliations:

8 <sup>1</sup>Western Sydney University, School of Science and Health, Locked Bag 1797,  
9 Penrith NSW 2751, Australia

10 <sup>2</sup>Liverpool Hospital Departments of Pain Medicine and Physiotherapy, Locked Bag  
11 7103 Liverpool, BC NSW 1871, Australia,

12 <sup>3</sup>Western Sydney University, School of Social Science and Psychology, Locked Bag  
13 1797, Penrith NSW 2751, Australia

14  
15 Word count: 3747 words

16  
17 Corresponding author: Bernadette Brady

18 Liverpool Hospital Department of Pain Medicine

19 Locked Bag 7103, Liverpool BC 1871, Australia

20 Phone: +61 2 87387200

Fax: +61 2 8738 7205

21 [Bernadette.brady@sswahs.nsw.gov.au](mailto:Bernadette.brady@sswahs.nsw.gov.au)

22  
23 **Key words:** Cultural diversity; Chronic pain; Physical Therapy Speciality; Cultural  
24 competency.

1 **Title:** Integrating culturally informed approaches into physiotherapy assessment and  
2 treatment of chronic pain: a pilot randomised controlled trial

3  
4 **Abstract**

5  
6 **Objective:** To evaluate patient engagement with, and the feasibility of, a novel,  
7 culturally adapted physiotherapy pain management approach

8  
9 **Design:** A participant- and assessor-blinded pilot randomised controlled trial

10  
11 **Setting:** Outpatient physiotherapy departments at two public hospitals and one  
12 district Pain Clinic.

13  
14 **Participants:** Adults ( $n=48$ ) with chronic musculoskeletal pain (daily pain >3-  
15 months), who self-identified as Mandaean, Assyrian or Vietnamese, were  
16 randomised to one of two physiotherapy treatment conditions.

17  
18 **Interventions:** Twenty-four participants underwent combined group and  
19 individualised treatment described as 'culturally adapted physiotherapy', while 24  
20 underwent evidence-informed 'usual physiotherapy care'. Both treatment arms  
21 consisted of up to 10 sessions over a 3-month period.

22  
23 **Outcome Measures:** Patient engagement was measured via participant attendance,  
24 adherence, and satisfaction data. Secondary outcomes included clinical measures of

1 pain severity, interference and suffering; physical function, and negative emotional  
2 state.

3  
4 **Results:** Ninety-six percent of participants undergoing culturally adapted  
5 physiotherapy completed treatment, compared with 58% of the usual physiotherapy  
6 group. Attendance and adherence were significantly higher in the culturally adapted  
7 group ( $p=0.013$  and  $p=0.008$ ). There was no difference for satisfaction between  
8 groups. For secondary outcomes, a significant between-group effect for pain-related  
9 suffering in favour of the culturally adapted group was observed with a medium effect  
10 size (partial  $\eta^2$  0.086,  $p=0.043$ ).

11  
12 **Conclusion(s):** Aligning treatment with the beliefs and values of CALD communities  
13 enhances patient engagement with physiotherapy. These results support the  
14 feasibility of a larger, multisite trial to determine if improved engagement with  
15 culturally adapted physiotherapy translates to improved clinical outcomes.

16  
17 **Trial Registration:** This study was prospectively registered with the Australian and  
18 New Zealand Clinical Trials Registry (ACTRN12616000857404).

## 1 **Strengths and limitations of this study**

- 2 • This was a randomised, assessor- and participant- blind controlled trial
- 3 • It provides evidence of feasibility of culturally adapted physiotherapy approaches  
4 for pain management as explored with three culturally and linguistically diverse  
5 communities
- 6 • Observed recruitment rates, follow-up rates and preliminary data can inform a  
7 future fully powered RCT
- 8 • As a pilot study, analysis of clinical outcomes are exploratory.

## 10 **Funding**

11 This work was supported by the Physiotherapy Research Foundation grant number  
12 S16-005. The development of the culturally adapted assessment protocols used in  
13 this trial was supported by a South West Sydney Local Health District and Ingham  
14 Institute Research Scholarship. BB is the recipient of a Sir Robert Menzies Memorial  
15 Research Scholarship in the Allied Health Sciences, from the Menzies Foundation,  
16 while SS receives salary support from the National Health and Medical Research  
17 Council of Australia (1105040).

## 19 **Conflict of interest**

20 All authors have completed the ICMJE uniform disclosure form at  
21 [www.icmje.org/coi\\_disclosure.pdf](http://www.icmje.org/coi_disclosure.pdf) and declare no conflicts of interest.

## 23 **Ethical Approval**

1  
2  
3 1 The study was approved by the South West Sydney Local Health District (SWSLHD)  
4  
5 2 Human Research Ethics Committee (HREC/16/LPOOL/194) and Western Sydney  
6  
7 3 University Human Research Ethics Committee (RH11741).  
8  
9  
10 4

11 **Original protocol for the study**

12  
13 6 Brady B, Veljanova I, Schabrun S, et al. Integrating culturally informed approaches  
14  
15 7 into the physiotherapy assessment and treatment of chronic pain: protocol for a pilot  
16  
17 8 randomised controlled trial. *BMJ Open* 2017;7(5):  
18  
19  
20 9 <http://bmjopen.bmj.com/content/7/5/e014449>.  
21  
22  
23  
24  
25 11

## 1 **Introduction**

2  
3  
4  
5  
6  
7 Patient engagement is paramount for the delivery of efficient and effective  
8 healthcare, reflecting a patients' relationship with the health encounter, such that  
9 they participate (attends and adheres) and recognise value in their treatment  
10 (satisfaction and treatment completion).<sup>1,2</sup> Research that has evaluated interventions  
11 and models of care to enhance patient engagement has provided evidence of  
12 success.<sup>2</sup> Whether this is true for culturally and linguistically diverse (CALD)  
13 communities remains uncertain.<sup>1</sup> This is problematic because healthcare must be  
14 responsive to the comparatively poorer health status observed in many CALD  
15 communities.<sup>3</sup> Further, strategies promoting engagement tailored to the needs of  
16 CALD communities is vital, particularly given that many countries around the world  
17 are now culturally plural societies.

18  
19  
20  
21  
22  
23  
24  
25  
26  
27  
28  
29  
30  
31  
32  
33 Culturally adapted approaches have been suggested to be an effective strategy to  
34 enhance patient engagement and reduce health disparities in CALD communities.<sup>1,4</sup>  
35  
36  
37  
38  
39  
40  
41  
42  
43  
44  
45  
46  
47  
48  
49  
50  
51  
52  
53  
54  
55  
56  
57  
58  
59  
60  
61  
62  
63  
64  
65  
66  
67  
68  
69  
70  
71  
72  
73  
74  
75  
76  
77  
78  
79  
80  
81  
82  
83  
84  
85  
86  
87  
88  
89  
90  
91  
92  
93  
94  
95  
96  
97  
98  
99  
100  
101  
102  
103  
104  
105  
106  
107  
108  
109  
110  
111  
112  
113  
114  
115  
116  
117  
118  
119  
120  
121  
122  
123  
124  
125  
126  
127  
128  
129  
130  
131  
132  
133  
134  
135  
136  
137  
138  
139  
140  
141  
142  
143  
144  
145  
146  
147  
148  
149  
150  
151  
152  
153  
154  
155  
156  
157  
158  
159  
160  
161  
162  
163  
164  
165  
166  
167  
168  
169  
170  
171  
172  
173  
174  
175  
176  
177  
178  
179  
180  
181  
182  
183  
184  
185  
186  
187  
188  
189  
190  
191  
192  
193  
194  
195  
196  
197  
198  
199  
200  
201  
202  
203  
204  
205  
206  
207  
208  
209  
210  
211  
212  
213  
214  
215  
216  
217  
218  
219  
220  
221  
222  
223  
224  
225  
226  
227  
228  
229  
230  
231  
232  
233  
234  
235  
236  
237  
238  
239  
240  
241  
242  
243  
244  
245  
246  
247  
248  
249  
250  
251  
252  
253  
254  
255  
256  
257  
258  
259  
260  
261  
262  
263  
264  
265  
266  
267  
268  
269  
270  
271  
272  
273  
274  
275  
276  
277  
278  
279  
280  
281  
282  
283  
284  
285  
286  
287  
288  
289  
290  
291  
292  
293  
294  
295  
296  
297  
298  
299  
300  
301  
302  
303  
304  
305  
306  
307  
308  
309  
310  
311  
312  
313  
314  
315  
316  
317  
318  
319  
320  
321  
322  
323  
324  
325  
326  
327  
328  
329  
330  
331  
332  
333  
334  
335  
336  
337  
338  
339  
340  
341  
342  
343  
344  
345  
346  
347  
348  
349  
350  
351  
352  
353  
354  
355  
356  
357  
358  
359  
360  
361  
362  
363  
364  
365  
366  
367  
368  
369  
370  
371  
372  
373  
374  
375  
376  
377  
378  
379  
380  
381  
382  
383  
384  
385  
386  
387  
388  
389  
390  
391  
392  
393  
394  
395  
396  
397  
398  
399  
400  
401  
402  
403  
404  
405  
406  
407  
408  
409  
410  
411  
412  
413  
414  
415  
416  
417  
418  
419  
420  
421  
422  
423  
424  
425  
426  
427  
428  
429  
430  
431  
432  
433  
434  
435  
436  
437  
438  
439  
440  
441  
442  
443  
444  
445  
446  
447  
448  
449  
450  
451  
452  
453  
454  
455  
456  
457  
458  
459  
460  
461  
462  
463  
464  
465  
466  
467  
468  
469  
470  
471  
472  
473  
474  
475  
476  
477  
478  
479  
480  
481  
482  
483  
484  
485  
486  
487  
488  
489  
490  
491  
492  
493  
494  
495  
496  
497  
498  
499  
500  
501  
502  
503  
504  
505  
506  
507  
508  
509  
510  
511  
512  
513  
514  
515  
516  
517  
518  
519  
520  
521  
522  
523  
524  
525  
526  
527  
528  
529  
530  
531  
532  
533  
534  
535  
536  
537  
538  
539  
540  
541  
542  
543  
544  
545  
546  
547  
548  
549  
550  
551  
552  
553  
554  
555  
556  
557  
558  
559  
560  
561  
562  
563  
564  
565  
566  
567  
568  
569  
570  
571  
572  
573  
574  
575  
576  
577  
578  
579  
580  
581  
582  
583  
584  
585  
586  
587  
588  
589  
590  
591  
592  
593  
594  
595  
596  
597  
598  
599  
600  
601  
602  
603  
604  
605  
606  
607  
608  
609  
610  
611  
612  
613  
614  
615  
616  
617  
618  
619  
620  
621  
622  
623  
624  
625  
626  
627  
628  
629  
630  
631  
632  
633  
634  
635  
636  
637  
638  
639  
640  
641  
642  
643  
644  
645  
646  
647  
648  
649  
650  
651  
652  
653  
654  
655  
656  
657  
658  
659  
660  
661  
662  
663  
664  
665  
666  
667  
668  
669  
670  
671  
672  
673  
674  
675  
676  
677  
678  
679  
680  
681  
682  
683  
684  
685  
686  
687  
688  
689  
690  
691  
692  
693  
694  
695  
696  
697  
698  
699  
700  
701  
702  
703  
704  
705  
706  
707  
708  
709  
710  
711  
712  
713  
714  
715  
716  
717  
718  
719  
720  
721  
722  
723  
724  
725  
726  
727  
728  
729  
730  
731  
732  
733  
734  
735  
736  
737  
738  
739  
740  
741  
742  
743  
744  
745  
746  
747  
748  
749  
750  
751  
752  
753  
754  
755  
756  
757  
758  
759  
760  
761  
762  
763  
764  
765  
766  
767  
768  
769  
770  
771  
772  
773  
774  
775  
776  
777  
778  
779  
780  
781  
782  
783  
784  
785  
786  
787  
788  
789  
790  
791  
792  
793  
794  
795  
796  
797  
798  
799  
800  
801  
802  
803  
804  
805  
806  
807  
808  
809  
810  
811  
812  
813  
814  
815  
816  
817  
818  
819  
820  
821  
822  
823  
824  
825  
826  
827  
828  
829  
830  
831  
832  
833  
834  
835  
836  
837  
838  
839  
840  
841  
842  
843  
844  
845  
846  
847  
848  
849  
850  
851  
852  
853  
854  
855  
856  
857  
858  
859  
860  
861  
862  
863  
864  
865  
866  
867  
868  
869  
870  
871  
872  
873  
874  
875  
876  
877  
878  
879  
880  
881  
882  
883  
884  
885  
886  
887  
888  
889  
890  
891  
892  
893  
894  
895  
896  
897  
898  
899  
900  
901  
902  
903  
904  
905  
906  
907  
908  
909  
910  
911  
912  
913  
914  
915  
916  
917  
918  
919  
920  
921  
922  
923  
924  
925  
926  
927  
928  
929  
930  
931  
932  
933  
934  
935  
936  
937  
938  
939  
940  
941  
942  
943  
944  
945  
946  
947  
948  
949  
950  
951  
952  
953  
954  
955  
956  
957  
958  
959  
960  
961  
962  
963  
964  
965  
966  
967  
968  
969  
970  
971  
972  
973  
974  
975  
976  
977  
978  
979  
980  
981  
982  
983  
984  
985  
986  
987  
988  
989  
990  
991  
992  
993  
994  
995  
996  
997  
998  
999  
1000



1  
2  
3 1  
4  
5 2 Chronic pain disorders contribute to considerable societal burden and personal  
6  
7 3 suffering.<sup>11</sup> Many physiotherapy interventions for chronic pain, particularly exercise  
8  
9 4 based approaches, are safe and effective.<sup>12-13</sup> Current evidenced based  
10  
11 5 recommendations suggest that exercise, when combined with cognitive behavioural  
12  
13 6 and psychosocial treatments, reduces pain, improves quality of life, and reduces  
14  
15 7 long term disability.<sup>12,14</sup> However, the efficacy of these approaches has been  
16  
17 8 established in general populations, with few studies including CALD and migrant  
18  
19 9 communities.<sup>10</sup> The limited research inclusive of CALD communities suggests limited  
20  
21 10 efficacy for pain, quality of life and psychological health outcomes.<sup>10</sup> Such  
22  
23 11 uncertainty supports investigation of sociocultural factors that could influence  
24  
25 12 implementation of pain management approaches within CALD communities.<sup>15</sup>  
26  
27  
28  
29  
30

31 14 Successful management of chronic pain requires a strong therapeutic alliance and  
32  
33 15 patient acceptance of, and engagement with, treatment concepts.<sup>16-17</sup> Unfortunately,  
34  
35 16 engagement with activity based treatments is often suboptimal in CALD  
36  
37 17 communities, evidenced by lower attendance, reduced acceptance, and premature  
38  
39 18 drop-out from treatment.<sup>10,18</sup> Discordant expectations, low patient-provider alliance,  
40  
41 19 cultural-spiritual factors and communication problems have been cited as  
42  
43 20 contributors to suboptimal engagement for CALD communities.<sup>19,20</sup> Since  
44  
45 21 engagement with treatment underpins improved patient outcomes<sup>21</sup>, it is imperative  
46  
47 22 that strategies are implemented to optimise engagement by CALD populations for  
48  
49 23 costly and debilitating conditions, such as chronic pain.  
50  
51  
52  
53  
54  
55  
56  
57  
58  
59  
60

1 Thus, the aim of this pilot study was to determine the feasibility, patient engagement,  
2 and trends of clinical effectiveness of a culturally adapted physiotherapy assessment  
3 and treatment approach compared with evidence informed 'usual physiotherapy  
4 care'. Thus, the research questions for this pilot randomised trial were:

- 5 1. Is a 12 week culturally adapted treatment approach superior to 'usual  
6 physiotherapy care', in terms of patient engagement (adherence, attendance, and  
7 satisfaction)?
- 8 2. Is it feasible to deliver and evaluate culturally adapted physiotherapy assessment  
9 and treatment approaches across three CALD communities using a randomised  
10 controlled trial design?

## 12 **Methods**

### 14 *Design*

15 This was a prospective, multi-centre pilot randomized controlled trial with concealed  
16 allocation, and participant and assessor blinding, using a patient sample with chronic  
17 pain drawn from 3 CALD communities (Mandaeen, Assyrian and Vietnamese). The  
18 trial was conducted across 2 hospital-based physiotherapy departments and one  
19 district Pain Clinic, between July 2016 and June 2017. A study protocol with eligibility  
20 criteria and intervention descriptions was published previously.<sup>22</sup> The study was  
21 approved by the South West Sydney Local Health District (SWSLHD) Human  
22 Research Ethics Committee (HREC/16/LPOOL/194), Western Sydney University  
23 Human Research Ethics Committee (RH11741) and was registered with the  
24 Australian and New Zealand Clinical Trials Registry (ACTRN12616000857404).

## 1 *Participants and Recruitment*

2 A total of 94 participants were assessed for eligibility with 48 randomised into the  
3 study. Inclusion criteria were: adult ( $\geq 18$  years), non-specific musculoskeletal pain,  
4 daily pain of greater than three months' duration, self-identification as a member of  
5 the Mandaean, Assyrian or Vietnamese ethnocultural communities, and ability to  
6 provide written informed consent in their own language or English. Exclusion criteria  
7 were: specific diagnoses necessitating other treatment (i.e. complex regional pain  
8 syndrome), surgery within the last 3-months, and assistance for mobility other than a  
9 walking stick, to ensure safety during a group or home-based exercise program.

10  
11 Sixteen participants from each community were allocated randomly to the  
12 experimental or control group after baseline assessment (Figure 1). Group allocation  
13 was determined by a computer-generated sequence with a 1:1 allocation ratio, with  
14 each ethnocultural community randomised separately. This was prepared by an  
15 independent investigator and concealed until assignment to ensure investigators and  
16 assessors were blind to therapy allocation. Participants were blind to treatment  
17 allocation and were told the trial was comparing two physiotherapy approaches for  
18 chronic pain and it was unknown which was more effective. Thus, participants were  
19 unaware they were receiving culturally adapted treatment approaches for the  
20 experimental groups. The success of blinding was assessed at the 3-month re-  
21 assessment with the question; "Do you think your physiotherapist has been trained in  
22 culturally responsive treatments for chronic pain?".

## 23 24 *Intervention*

1  
2  
3 1 Participants from Intervention and Control groups attended for a maximum of 10  
4  
5 2 sessions of physiotherapy over a 3-month treatment period. A maximum of '10'  
6  
7 3 sessions was selected to enable the treating physiotherapist to tailor interventions to  
8  
9 4 the individual needs of participants, and was consistent with the average number of  
10  
11 5 physiotherapy sessions reported in clinical trials for the management of chronic  
12  
13 6 pain.<sup>13-14</sup> All participants were given a home exercise program designed by their  
14  
15 7 physiotherapist, and they were provided with translated log-books to facilitate  
16  
17 8 recording of exercise adherence. A professional health interpreter was available for  
18  
19 9 all treatment sessions (group and individual), if required, in accordance with best  
20  
21 10 practice.  
22  
23  
24  
25  
26  
27  
28

29 13 *i. Culturally adapted physiotherapy assessment and treatment*

30  
31 14 Participants received a combination of group and individual physiotherapy sessions,  
32  
33 15 adapted to reflect the ethnocultural beliefs and values of the community to which the  
34  
35 16 participant identified. Three ethnocultural-specific group programs were designed by  
36  
37 17 the research team, informed by qualitative research involving each community and  
38  
39 18 guided by two adaptation frameworks.<sup>15,22</sup> Sessions were delivered once per week  
40  
41 19 for 6-weeks, included a combination of education and exercise, and were conducted  
42  
43 20 in groups of 8 participants from the same ethnocultural community. Sessions were  
44  
45 21 run by a physiotherapist at a local community facility, and facilitated by a bilingual  
46  
47 22 educator in the language of participants. In addition to an initial physiotherapy  
48  
49 23 assessment, group sessions were supplemented by up to 3 individual sessions  
50  
51 24 tailored to the participant according to the culturally-informed initial assessment to  
52  
53 25 ensure consistency with the dose of the control group. Components of the cultural  
54  
55  
56  
57  
58  
59  
60

1 adaptation for each ethnocultural community have been previously published and a  
2 summary is presented in Appendix 1.<sup>22</sup>

3  
4 *ii. Evidence informed 'usual physiotherapy care'*

5 Participants allocated to this condition attended physiotherapy in the outpatient  
6 department where they were referred, for treatment informed by evidence based  
7 recommendations for chronic pain. All treating physiotherapists underwent a training  
8 session to familiarise them with evidence-based management of chronic pain.  
9 Treatment adherence to these guidelines was monitored by review of therapist  
10 treatment logs. Treating physiotherapists used their clinical judgement to guide the  
11 specifics of treatment according to principles of patient-centred care.<sup>23</sup> Following the  
12 initial assessment, physiotherapists worked with patients to select the treatment  
13 mode (individual or group based), frequency and dose (to a maximum of 10  
14 sessions) tailored to the patient's needs and goals, consistent with best available  
15 evidence.<sup>13,24</sup>

16  
17 *Outcomes*

18 Trained assessors, not involved in the recruitment or treatment of participants and  
19 unaware of group assignment, performed assessments according to standardised  
20 instructions at baseline (Month 0), and 3-month reassessment). Success of assessor  
21 blinding was determined with the question; "Did you know to which treatment arm the  
22 participant belonged?" If an assessor responded "yes", they were asked to nominate;  
23 "to which group?".

24

1  
2  
3 1 Data to assess feasibility were collected throughout the trial period regarding  
4  
5 2 recruitment rates, treatment withdrawals, therapist fidelity to evidence-based  
6  
7 3 guidelines, success of participant and assessor blinding, and trial drop-outs. Primary  
8  
9 4 outcome measures were: measures of patient engagement, defined by attendance;  
10  
11 5 and adherence to, and satisfaction with treatment. Attendance was measured as the  
12  
13 6 proportion of sessions attended, relative to the number of sessions scheduled.  
14  
15 7 Adherence was calculated as a percentage of the average number of home exercise  
16  
17 8 sessions completed each week, relative to the number of sessions prescribed,  
18  
19 9 determined from participant log-books or self-report (where the participant was  
20  
21 10 unable or did not complete the log-book).<sup>25</sup> Patient satisfaction with treatment was  
22  
23 11 evaluated using the Client Satisfaction Questionnaire (CSQ-8)<sup>26</sup>, which evaluates  
24  
25 12 satisfaction with treatment generally, and was selected because it validated in Arabic  
26  
27 13 and Vietnamese.  
28  
29  
30  
31  
32

33 15 Secondary outcomes included core measures recommended by the Initiative on  
34  
35 16 Methods, Measurement, and Pain Assessment in Clinical Trials (IMMPACT).<sup>27</sup> This  
36  
37 17 included measures for pain severity and interference (Brief Pain Inventory: BPI)<sup>28</sup>,  
38  
39 18 pain-related suffering (Pictorial Representation of Illness and Self Measure:  
40  
41 19 PRISM)<sup>29</sup>, physical function (6-minute walk test: 6MWT, and 1 minute sit to stand  
42  
43 20 test: STS test)<sup>30 31</sup> and severity of symptoms for Depression, Anxiety, and Stress  
44  
45 21 (DASS-21).<sup>32</sup> The reliability and validity of these measures, including for Arabic and  
46  
47 22 Vietnamese translations, has been reported previously and was documented in the  
48  
49 23 trial protocol.<sup>22</sup>  
50  
51  
52  
53

54 25 *Patient involvement*  
55  
56  
57  
58  
59  
60

1  
2  
3 1 The research questions were developed following qualitative enquiry into the  
4  
5 2 experience of chronic pain among CALD communities.<sup>15</sup> Specifically, challenges  
6  
7 3 raised by participants accessing and participating in pain management in South-  
8  
9 4 West Sydney were incorporated in the study design. As such, participant  
10  
11 5 engagement was considered a primary outcome measure. While patients were not  
12  
13 6 involved in the recruitment and conduct of the study, all participants were given the  
14  
15 7 opportunity to attend a feedback session following trial completion, held in local  
16  
17 8 community venues.  
18  
19  
20  
21

### 22 10 *Sample Size and Statistical Analysis*

23  
24 11 A total sample of 48 participants was deemed appropriate to allow the piloting of a  
25  
26 12 novel culturally adapted program with three communities (8 participants per  
27  
28 13 program), while ensuring equal numbers in both treatment arms (24 culturally  
29  
30 14 adapted and 24 usual care) and allowing for the detection of medium to large effects,  
31  
32 15 should they exist.<sup>33-34</sup>  
33  
34  
35  
36  
37

38 17 Descriptive statistics were used to report the characteristics of participants, including  
39  
40 18 means and standard deviations (SDs) for continuous variables, and frequencies and  
41  
42 19 proportions (%) for categorical variables. Between-group differences for baseline  
43  
44 20 characteristics of participants were analysed using independent *t* test for continuous  
45  
46 21 variables, and chi-square test for categorical variables. Primary outcome measures  
47  
48 22 (attendance, adherence and satisfaction) were evaluated using descriptive statistics  
49  
50 23 and Mann-Whitney U tests, because data were not normally distributed and  
51  
52 24 transformations did not achieve normality.  
53  
54  
55  
56  
57  
58  
59  
60

1 Exploratory examination for group differences in secondary outcome measures was  
2 undertaken using a repeated-measures analysis of variance (ANOVA), with the  
3 treatment condition (usual care/culturally adapted intervention) as the between-group  
4 factor, and time of assessment (pre-intervention or re-assessment) as the repeated,  
5 within-group factor. One-way repeated measures ANOVAs compared within-group  
6 main effects at each time point. Effect sizes were classified as small, medium or  
7 large (partial  $\eta^2$  0.01, 0.06, 0.14, respectively).<sup>35</sup> If the assumptions of ANOVA were  
8 violated, data were transformed to achieve a normal distribution<sup>36</sup> before repeating  
9 the ANOVA. Intention-to treat analyses were performed for all participants and  
10 missing data were addressed by carrying the last data point forward. Statistical  
11 significance was set at 0.05. Analyses were performed using the Statistical Package  
12 for the Social Sciences, Version 24.

## 14 **Results**

### 15 *Feasibility and treatment characteristics*

16 Forty-eight participants, 16 from each ethnocultural community, were randomised  
17 within 4 months (Figure 1). For the culturally adapted treatment arm, treatment was  
18 delivered according to the protocol for 23/24 participants. On average, two individual  
19 sessions (excluding initial assessment) were recommended to supplement the six  
20 group sessions (range 0-3). One participant discontinued treatment prematurely,  
21 citing illness. For the usual care arm, 14 participants completed the treatment they  
22 were allocated. Ten participants withdrew from treatment citing reasons that included  
23 illness ( $n=1$ ), treatment not helping ( $n=4$ ), lack of time ( $n=1$ ), and changed mind/  
24 sought care elsewhere ( $n=4$ ). Treating physiotherapists in the usual care arm utilised  
25 both group and individual modes of delivery for 8/24 participants, while individual



1  
2  
3 1 therapy alone was recommended for 16 participants. Therapist fidelity to evidence  
4  
5 2 based principles was confirmed for all participants, except for the two participants  
6  
7 3 who withdrew following their initial assessment.  
8  
9 4

10 5 Blinded re-assessment data were available for 45 participants, with 3 participants  
11  
12 6 (usual care group) withdrawing from the trial and declining final assessment for  
13  
14 7 similar reasons: “treatment has not helped me”, “treatment has not done anything to  
15  
16 8 help my leg pain at all”, and “treatment has been a waste of time”. As such, the last  
17  
18 9 data point for each was carried forward for all outcomes except satisfaction, for  
19  
20 10 which an initial data point was not available. Success rates for assessor blinding was  
21  
22 11 91%, while 44% of participants correctly answered the blinding question regarding  
23  
24 12 their therapists’ cultural responsiveness. No participant experienced an adverse  
25  
26 13 event due to participation in the trial.  
27  
28  
29  
30  
31  
32

33 15 Demographic and baseline symptom characteristics of participants are displayed in  
34  
35 16 Table 1. There were no significant differences between the groups for baseline  
36  
37 17 characteristics.  
38  
39  
40  
41

#### 42 19 *Primary outcomes*

##### 43 20 *Attendance*

44  
45  
46 21 Overall mean ( $\pm$ SD) attendance at physiotherapy was 8.0  $\pm$ 3.1 visits. The culturally  
47  
48 22 adapted treatment group attended a significantly higher number of scheduled  
49  
50 23 sessions compared to ‘usual physiotherapy care’ (mean difference = 4.0 sessions,  
51  
52 24 95%CI 2.6 to 5.3,  $p < 0.001$ ). There was an 87% ( $\pm$ 18) attendance rate in the  
53  
54  
55  
56  
57  
58  
59  
60

1  
2  
3 1 culturally adapted program, compared to 68% ( $\pm 32$ ) in the usual care group ( $U=170$ ,  
4  
5 2  $p=0.013$ ,  $Z=-2.473$ ,  $r=0.36$ ).  
6  
7  
8  
9

#### 10 4 *Home Exercise Adherence*

11  
12  
13 5 Home exercise adherence data was available for all participants in the culturally  
14  
15 6 adapted program ( $n=24$ ) and 22 participants from the usual care group. Data were  
16  
17 7 absent for 2 participants who dropped out after their initial visit. Overall, adherence  
18  
19 8 varied from 0% to 100%. The culturally adapted group had a significantly higher  
20  
21 9 adherence rate (88%  $\pm 15$ ) compared to usual physiotherapy care (55%  $\pm 43$ ) ( $U=145$ ,  
22  
23  
24 10  $p=0.008$ ,  $Z=-2.659$ ,  $r=0.39$ ).  
25  
26  
27  
28  
29

#### 30 12 *Satisfaction*

31  
32  
33 13 Satisfaction data were available for all participants who attended the 3-month blinded  
34  
35 14 assessment ( $n=45$ ). Overall, 93% of participants were satisfied with treatment, and  
36  
37 15 71% were highly satisfied, evaluated by a score of greater than 50% and 75%,  
38  
39 16 respectively for the CSQ-8. Satisfaction between the two groups did not differ  
40  
41 17 ( $U=235$ ,  $z=-0.388$ ,  $p=0.698$ ). Mean CSQ-8 scores for the culturally adapted and  
42  
43 18 usual physiotherapy care groups were 82.7 ( $\pm 13.4$ ) and 79.3 ( $\pm 17.3$ ).  
44  
45  
46  
47

#### 48 20 *Secondary Outcomes*

49  
50  
51 21 Culturally adapted treatment resulted in greater improvements in pain related  
52  
53 22 suffering than 'usual physiotherapy care', while no other significant between-group  
54  
55  
56  
57  
58  
59  
60

1  
2  
3 1 differences were observed. Between-group comparisons and associated effect sizes  
4  
5 2 are presented in Table 2.  
6

#### 7 3 8 9 4 *Sample size estimates*

10 5 With respect to feasibility for a larger trial based on trial data, for power of 80%,  
11  
12 6 alpha of 5%, and a drop-out rate of 20%, a sample size of 124 in each group would  
13  
14 7 be required to detect a clinically significant difference of 50m for walking distance<sup>37</sup>  
15  
16 8 for the intervention group, based on the SD observed in our study of 128m. This  
17  
18 9 sample size would also be sufficient to identify between-group differences for the BPI  
19  
20 10 Severity (2.2-point difference, SD 2.51) and Interference subscales (2.2-point  
21  
22 11 difference, SD 2.55), the PRISM suffering score (3.3 cm difference, SD 8.46) and the  
23  
24 12 DASS total score (13-point difference, SD 31.88). A sample size of 300 would also  
25  
26 13 allow for clinically important between-group differences to be detected for the 1-  
27  
28 14 minute STS test (3 repetition difference, SD 8.46).  
29  
30  
31  
32  
33  
34

#### 35 16 **Discussion**

36  
37 17  
38  
39 18 The culturally adapted program was designed to target specific language, cultural,  
40  
41 19 and access barriers faced by CALD communities that participate in pain  
42  
43 20 management treatments. Results from this pilot study suggest there is an advantage  
44  
45 21 in favour of a culturally adapted physiotherapy program relative to usual  
46  
47 22 physiotherapy care for addressing barriers to optimal patient engagement. The  
48  
49 23 culturally adapted programs were well-received by all 3 communities, demonstrated  
50  
51 24 by significantly higher patient engagement (attendance, completion of treatment, and  
52  
53 25 adherence) compared to the usual care group. While specific conclusions regarding  
54  
55  
56  
57  
58  
59  
60

1  
2  
3 1 the efficacy of treatment for clinical outcomes cannot be made, the findings observed  
4  
5 2 for secondary outcome measures provide support for further investigating culturally  
6  
7 3 adapted treatments in CALD communities using a randomised controlled trial design.  
8  
9 4

10 5 Attendance and treatment retention is an important aspect of patient engagement  
11  
12 6 essential to ensure positive outcomes from cognitive behavioural and exercise  
13  
14 7 treatments for chronic pain are realised.<sup>16-17</sup> Despite this, drop-out from pain  
15  
16 8 management programs has been reported to be as high as 40%<sup>38</sup>, while for  
17  
18 9 exercise-based physiotherapy, drop-out rates of 30-40% are common<sup>39-40</sup>. In the  
19  
20 10 current study, drop-out rates in the 'usual physiotherapy care' group (42%) were  
21  
22 11 consistent with rates observed in the literature<sup>18,39,40</sup>, while for the 'culturally adapted'  
23  
24 12 group, drop-out was less (4%). Further, attendance at scheduled sessions was  
25  
26 13 significantly higher in the 'culturally adapted' group, and participants were willing to  
27  
28 14 attend for a greater number of sessions. In combination, such findings suggest that  
29  
30 15 attention to social and ethnocultural dimensions unique to CALD migrant  
31  
32 16 communities successfully engaged participants. For the culturally adapted group, a  
33  
34 17 combination of both surface- (language, food, music, group interaction and  
35  
36 18 environment) and deep-level (reframing content to align with explanatory models of  
37  
38 19 pain and ethnocultural values) adaptations were included to enhance the cultural  
39  
40 20 relevance of program content and facilitate patient engagement.<sup>22</sup> Based on the  
41  
42 21 primary outcomes from the current study, such adaptations should be important  
43  
44 22 considerations for future research.  
45  
46  
47  
48  
49  
50  
51  
52  
53  
54  
55  
56  
57  
58  
59  
60

23  
24 Treatment adherence is an aspect of patient engagement that has been positively  
25 related to patient outcomes in rehabilitation programs.<sup>17</sup> Nevertheless, adherence to

1  
2  
3 1 exercise interventions for chronic pain conditions is suboptimal.<sup>41</sup> For example,  
4  
5 2 adherence rates for osteoarthritis exercise programs can be as low as 50%<sup>42</sup>, and  
6  
7 3 varies between 64% and 71% respectively, for neck pain and low back pain.<sup>41,43</sup> For  
8  
9 4 the current study, there was wide variation in adherence rates for the 'usual care'  
10  
11 5 group with a mean of 55% ( $\pm 43$ ), while for the 'culturally adapted' group, adherence  
12  
13 6 was significantly higher and less variable (88%  $\pm 15$ ). Low adherence rates in the  
14  
15 7 'usual care' group could have been due to suboptimal communication, patient-  
16  
17 8 provider interactions, and failure to adequately tailor interventions to the sociocultural  
18  
19 9 needs of the individual patient.<sup>44</sup> Further, a systematic review<sup>25</sup> cited the association  
20  
21 10 between anxiety and depression, highly prominent symptoms in our sample, with  
22  
23 11 reduced adherence to physiotherapy. However, since both treatment arms  
24  
25 12 experienced similar symptoms, this association alone, does not account for the  
26  
27 13 different adherence rates observed. Similarly, the low adherence rate for the 'usual  
28  
29 14 care' group could not be ascribed to language barriers, since both groups had similar  
30  
31 15 access to professional interpreting services and translated exercise diaries. Instead,  
32  
33 16 the current findings emphasise a potential role for physiotherapists to optimise the  
34  
35 17 inter-cultural therapeutic interaction by attending to a patient's beliefs and values,  
36  
37 18 and aligning treatment components accordingly.  
38  
39  
40  
41  
42  
43

44 20 Baseline outcome data from the three CALD communities highlighted participants'  
45  
46 21 severe pain and psychological symptoms. Participants had higher mean pain  
47  
48 22 duration, and average pain severity scores, than those observed in cohorts attending  
49  
50 23 multidisciplinary pain clinics.<sup>45</sup> Similarly, average scores for depression, anxiety, and  
51  
52 24 stress according to the DASS, were all in the 'severe' range, and higher than mean  
53  
54 25 scores observed in a large Australian pain clinic cohort.<sup>45</sup> Potentially, such  
55  
56  
57  
58  
59  
60

1 observations were not surprising given 71% of our sample identified as refugees.  
2  
3 However, in the context of severe depression, the efficacy of rehabilitation programs  
4  
5 for chronic pain programs is known to be reduced.<sup>46</sup> As such, the physiotherapy  
6  
7 approaches employed in our study might be insufficient to induce meaningful  
8  
9 changes in pain and psychosocial functioning. While the individualised design of  
10  
11 both treatment arms allowed for the involvement of other specialities, such as  
12  
13 psychology, participants did not pursue this recommendation in 85% of cases. Such  
14  
15 low uptake, in combination with high pain and psychological symptom scores,  
16  
17 emphasises a need for treatment adaptations to engage other disciplines and align  
18  
19 comprehensive multidisciplinary approaches with the beliefs, values, and unique  
20  
21 needs of diverse ethnocultural communities. However, the maintained high  
22  
23 adherence and attendance data for the culturally adapted group in the presence of  
24  
25 high pain scores and psychological symptoms was a positive finding.  
26  
27  
28  
29  
30  
31  
32

### 33 *Feasibility*

34  
35 Previous research involving CALD communities has identified significant challenges  
36  
37 in engagement and retention in clinical research.<sup>47</sup> Williams et al<sup>48</sup> enrolled and  
38  
39 randomised 78 participants from 3 CALD backgrounds (Greek, Italian, and  
40  
41 Vietnamese) living with chronic disease to a medication self-management program  
42  
43 and found less than half completed the post-treatment reassessment (3-months).  
44  
45 Similarly, Swerissen et al<sup>49</sup> found a 35% drop-out rate among CALD communities in  
46  
47 Australia enrolled to a chronic disease self-management program. Despite this, our  
48  
49 experience supports research inclusive of, and specifically targeted towards, CALD  
50  
51 communities. Our high recruitment rates, short recruitment time, absence of adverse  
52  
53 outcomes, and low trial drop-out rate of 6%, supports the feasibility of implementing  
54  
55  
56  
57  
58  
59  
60

1  
2  
3 1 randomised controlled research trial designs within CALD communities. Specific  
4  
5 2 attention should be given towards involvement of bilingual support workers,  
6  
7 3 professional translation and interpreting services, and engagement of ethnocultural  
8  
9 4 community members in trial design and implementation, to optimise the prospects of  
10  
11 5 the success of our pilot study.<sup>10</sup> Finally, sample size estimates using our pilot data  
12  
13 6 inform the feasibility of a fully powered RCT to evaluate the clinical effectiveness of  
14  
15 7 culturally adapted approaches, with the potential to maintain participant engagement.  
16  
17  
18 8

### 9 *Study Limitations*

10 While the 'culturally adapted' program was successfully piloted across the 3  
11 ethnocultural communities, it is important to note the study's limitations. First,  
12 participant adherence data relied on self-report. A log book was developed to  
13 facilitate recording of adherence, but many participants (15/48) had difficulty  
14 completing and/or did not complete the log-book. As such self-report during sessions  
15 was used, and therefore data could have been compromised by recall error, or  
16 desire to please the treatment provider.<sup>50</sup> This is a challenge for researchers working  
17 with CALD communities who have linguistic limitations, with a need to find reliable,  
18 valid measures for recording patient adherence to address such issues. Second,  
19 some participants with low education and literacy levels (33% of the sample had  
20 either no or primary level schooling) were challenged by the log book and scale  
21 outcome measures, potentially compromising results. However, the challenge of  
22 literacy was similar for both groups and is unlikely to explain any between-group  
23 differences because all participants were provided with assistance from the bilingual  
24 blinded assessor to interpret and complete outcome measures. Third, 44% of  
25 participants were potentially unblinded, based on their responses to the participant

1 blinding question. However, since the difference between the two treatment arms  
2 ('culturally adapted' versus 'usual physiotherapy') and study hypothesis was not  
3 disclosed to participants, it is unlikely that this substantially influenced their treatment  
4 outcomes. Fourth, since there was no follow-up beyond treatment conclusion, we  
5 cannot report the sustainability of treatment gains. Thus, there is a need for longer-  
6 term outcomes. Finally, current results only relate to the 3 ethnocultural communities  
7 of interest and are not generalizable to broader CALD communities within Australia  
8 or internationally. Nonetheless, improved engagement by all 3 communities  
9 highlights that treatment approaches can be effectively adapted to suit individual  
10 communities, using a structured adaptation framework<sup>22</sup>.

## 12 **Conclusions**

13 To meet the needs of multicultural populations, interventions should be tailored to  
14 the individual, social, and ethnocultural factors that influence health. Novel  
15 interventions, such as the culturally adapted physiotherapy approaches documented  
16 in this study, are likely to be critical for the development of effective pain  
17 management approaches that fully engage CALD patients with chronic pain.



## 1 **Acknowledgments**

2 The authors would like to acknowledge the bilingual community educators and  
3 volunteers who supported the design and implementation of this trial. Special thanks  
4 to the physiotherapy and administrative staff who assisted with aspects of trial  
5 implantation and delivery of interventions.

## 7 **Author contribution**

8 All authors have made a substantial contribution to this work. Conception, design,  
9 analysis and interpretation of data were completed by BB under the supervision of  
10 IV, SS and LC. All authors were involved in interpretation of the data, writing and  
11 editing of the manuscript. All authors have read and approved the final manuscript.

## 13 **Data Sharing**

14 Data are available by contacting the corresponding author at  
15 [Bernadette.brady@health.nsw.gov.au](mailto:Bernadette.brady@health.nsw.gov.au).

16

## 1 **References**

- 2
- 3
- 4
- 5
- 6
- 7 1. Chen J, Mullins CD, Novak P, et al. Personalized Strategies to Activate and
- 8 Empower Patients in Health Care and Reduce Health Disparities. *Health Educ*
- 9 *Behav.* 2016;43:25-34.
- 10
- 11 2. Barello S, Graffigna G, Vegni E. Patient Engagement as an Emerging Challenge
- 12 for Healthcare Services: Mapping the Literature. *Nursing Research and Practice.*
- 13 2012;1-7.
- 14
- 15 3. Khoo S-E. Ethnic disparities in social and economic well-being of the immigrant
- 16 aged in Australia. *Journal of Population Research.* 2012;29:119-140.
- 17
- 18 4. Henderson S, Kendall E, See L. The effectiveness of culturally appropriate
- 19 interventions to manage or prevent chronic disease in culturally and linguistically
- 20 diverse communities: a systematic literature review. *Health Soc Care Community.*
- 21 2011;19:225-249.
- 22
- 23 5. Griner D, Smith TB. Culturally adapted mental health intervention: A meta-analytic
- 24 review. *Psychotherapy.* 2006;43:531-548.
- 25
- 26 6. Chowdhary N, Jotheeswaran AT, Nadkarni A, et al. The methods and outcomes of
- 27 cultural adaptations of psychological treatments for depressive disorders: a
- 28 systematic review. *Psychol Med.* 2014;44:1131-1146.
- 29
- 30 7. Nierkens V, Hartman MA, Nicolaou M, et al. Effectiveness of Cultural Adaptations
- 31 of Interventions Aimed at Smoking Cessation, Diet, and/or Physical Activity in Ethnic
- 32 Minorities. A Systematic Review. *PLoS ONE.* 2013;8:e73373.
- 33
- 34 8. Guadagnolo BA, Petereit DG, Coleman CN. Cancer Care Access and Outcomes
- 35 for American Indian Populations in the United States: Challenges and Models for
- 36 Progress. *Semin Radiat Oncol.* 2017; 27:143-149.
- 37
- 38
- 39
- 40
- 41
- 42
- 43
- 44
- 45
- 46
- 47
- 48
- 49
- 50
- 51
- 52
- 53
- 54
- 55
- 56
- 57
- 58
- 59
- 60

- 1  
2  
3 1 9. Harper Shehadeh M, Heim E, Chowdhary N, et al. Cultural Adaptation of  
4  
5 2 Minimally Guided Interventions for Common Mental Disorders: A Systematic Review  
6  
7 3 and Meta-Analysis. *JMIR Mental Health*. 2016;3:e44.  
8  
9 4 10. Brady B, Veljanova I, Chipchase L. Are multidisciplinary interventions  
10  
11 5 multicultural? A topical review of the pain literature as it relates to culturally diverse  
12  
13 6 patient groups. *Pain*. 2016;157:321-328.  
14  
15 7 11. Vos T, Flaxman AD, Naghavi M, et al. Years lived with disability (YLDs) for 1160  
16  
17 8 sequelae of 289 diseases and injuries 1990-2010: a systematic analysis for the  
18  
19 9 Global Burden of Disease Study 2010. *Lancet*. 2012;380:2163-2196.  
20  
21 10 12. Hall A, Richmond H, Copsey B, et al. Physiotherapist-delivered cognitive-  
22  
23 11 behavioural interventions are effective for low back pain, but can they be replicated  
24  
25 12 in clinical practice? A systematic review. *Disabil Rehabil*. 2016:1-9.  
26  
27 13 13. Kaapa EH, Frantsi K, Sarna S, et al. Multidisciplinary group rehabilitation versus  
28  
29 14 individual physiotherapy for chronic nonspecific low back pain: a randomized trial.  
30  
31 15 *Spine*. 2006;31:371-6.  
32  
33 16 14. Sullivan MJL, Adams H. Psychosocial Treatment Techniques to Augment the  
34  
35 17 Impact of Physiotherapy Interventions for Low Back Pain. *Physiother Can*.  
36  
37 18 2010;62:180-189.  
38  
39 19 15. Brady B, Veljanova I, Chipchase L. An exploration of the experience of pain  
40  
41 20 among culturally diverse migrant communities. *Rheumatology Advances in Practice*.  
42  
43 21 2017;1:rkx002.  
44  
45 22 16. Hall AM, Ferreira PH, Maher CG, et al. The Influence of the Therapist-Patient  
46  
47 23 Relationship on Treatment Outcome in Physical Rehabilitation: A Systematic  
48  
49 24 Review. *Phys Ther*. 2010; 90:1099-110.  
50  
51  
52  
53  
54  
55  
56  
57  
58  
59  
60

- 1  
2  
3 17. Nicholas MK, Asghari A, Corbett M, et al. Is adherence to pain self-management  
4 strategies associated with improved pain, depression and disability in those with  
5  
6  
7 3 disabling chronic pain? *Eur J Pain*. 2012;16:93-104.  
8  
9 4 18. Sloots M, Scheppers EF, van de Weg FB, et al. Higher dropout rate in non-native  
10 patients than in native patients in rehabilitation in The Netherlands. *Int J Rehabil*  
11  
12 5 *Res*. 2009;32:232-237.  
13  
14 6  
15 7 19. Mir G, Sheikh A. 'Fasting and prayer don't concern the doctors ... they don't even  
16 know what it is': communication, decision-making and perceived social relations of  
17  
18 8 Pakistani Muslim patients with long-term illnesses. *Ethn Health*. 2010;15:327-342.  
19  
20 9 20. Sloots M, Dekker JH, Pont M, et al. Reasons of drop-out from rehabilitation in  
21 patients of Turkish and Moroccan origin with chronic low back pain in The  
22  
23 10  
24 11 patients of Turkish and Moroccan origin with chronic low back pain in The  
25  
26 12  
27 Netherlands: a qualitative study. *J Rehabil Med*. 2010;42:566-573.  
28  
29 13 21. Doyle C, Lennox L, Bell D. A systematic review of evidence on the links between  
30 patient experience and clinical safety and effectiveness. *BMJ Open*. 2013;3:e001570  
31  
32 14  
33 15 22. Brady B, Veljanova I, Schabrun S, et al. Integrating culturally informed  
34 approaches into the physiotherapy assessment and treatment of chronic pain:  
35  
36 16 approaches into the physiotherapy assessment and treatment of chronic pain:  
37  
38 17 protocol for a pilot randomised controlled trial. *BMJ Open*. 2017;7:e 014449  
39  
40 18 23. Cheng L, Leon V, Liang A, et al. Patient-centered care in physical therapy:  
41 definition, operationalization, and outcome measures. *Physical Therapy Reviews*.  
42  
43 19  
44 20 2016;21:109-23.  
45  
46 21 24. Critchley DJ, Ratcliffe J, Noonan S, et al. Effectiveness and cost-effectiveness of  
47 three types of physiotherapy used to reduce chronic low back pain disability: a  
48  
49 22 three types of physiotherapy used to reduce chronic low back pain disability: a  
50  
51 23 pragmatic randomized trial with economic evaluation. *Spine*. 2007;32:1474-1481.  
52  
53 24 25. Jack K, McLean SM, Moffett JK, et al. Barriers to treatment adherence in  
54 physiotherapy outpatient clinics: A systematic review. *Man Ther*. 2010;15:220-228.  
55  
56  
57  
58  
59  
60

- 1  
2  
3 1 26. Attkisson CC, Zwick R. The client satisfaction questionnaire. Psychometric  
4  
5 2 properties and correlations with service utilization and psychotherapy outcome. *Eval*  
6  
7 3 *Program Plann.* 1982;5:233-237.  
8  
9 4 27. Dworkin R, Turk DC, Farrar J, et al. Core outcome measures for chronic pain  
10  
11 5 clinical trials: IMMPACT recommendations. *Pain.* 2005;113:9-19.  
12  
13 6 28. Keller S, Bann CM, Dodd SL, et al. Validity of the brief pain inventory for use in  
14  
15 7 documenting the outcomes of patients with noncancer pain. *Clin J Pain.*  
16  
17 8 2004;20:309-318.  
18  
19 9 29. Kassardjian CD, Gardner-Nix J, Dupak K, et al. Validating PRISM (Pictorial  
20  
21 10 Representation of Illness and Self Measure) as a measure of suffering in chronic  
22  
23 11 non-cancer pain patients. *J Pain.* 2008;9:1135-1143.  
24  
25 12 30. Harding V, De C Williams AC, Richardson P, et al. The development of a battery  
26  
27 13 of measures for assessing physical functioning of chronic pain patients. *Pain.*  
28  
29 14 1994;58:367-375.  
30  
31 15 31. Peppin JF, Marcum S, Kirsh KL. The chronic pain patient and functional  
32  
33 16 assessment: use of the 6-Minute Walk Test in a multidisciplinary pain clinic. *Curr*  
34  
35 17 *Med Res Opin.* 2014;30:361-365.  
36  
37 18 32. Lovibond SH, Lovibond PF. *Manual for the Depression Anxiety Stress Scales.*  
38  
39 19 2nd ed. Sydney: Psychology Foundation; 1995.  
40  
41 20 33. Hertzog MA. Considerations in determining sample size for pilot studies. *Res*  
42  
43 21 *Nurs Health* 2008;31:180-91.  
44  
45 22 34. Viechtbauer W, Smits L, Kotz D, et al. A simple formula for the calculation of  
46  
47 23 sample size in pilot studies. *J Clin Epidemiol* 2015;68:1375-9.  
48  
49 24 35. Richardson J. Eta squared and partial eta squared as measures of effect size in  
50  
51 25 educational research. *Educational Research Review.* 2011;6:135-147.  
52  
53  
54  
55  
56  
57  
58  
59  
60

- 1  
2  
3 1 36. Templeton G. A Two-Step Approach for Transforming Continuous Variables to  
4  
5 2 Normal: Implications and Recommendations for IS Research. *Communications of the*  
6  
7 3 *Association for Information Systems*. 2011;28:41-58.  
8  
9 4 37. Perera S, Mody SH, Woodman RC, et al. Meaningful change and  
10  
11 5 responsiveness in common physical performance measures in older adults. *J Am*  
12  
13 6 *Geriatr Soc*. 2006;54:743-749.  
14  
15 7 38. Martin J, Torre F, Aguirre U, et al. Evaluation of the interdisciplinary PSYMEPHY  
16  
17 8 treatment on patients with fibromyalgia: a randomized control trial. *Pain Med*.  
18  
19 9 2014;15:682-691.  
20  
21 10 39. Long A, Donelson R, Fung T. Does it matter which exercise? A randomized  
22  
23 11 control trial of exercise for low back pain. *Spine*. 2004;29:2593-2602.  
24  
25 12 40. Rooks DS, Gautam S, Romeling M, et al. Group exercise, education, and  
26  
27 13 combination self-management in women with fibromyalgia: A randomized trial. *Arch*  
28  
29 14 *Intern Med*. 2007;167:2192-2200.  
30  
31 15 41. McLean SM, Klaber Moffett JA, Sharp DM, et al. A randomised controlled trial  
32  
33 16 comparing graded exercise treatment and usual physiotherapy for patients with non-  
34  
35 17 specific neck pain (the GET UP neck pain trial). *Man Ther*. 2013;18:199-205.  
36  
37 18 42. Carr A. Barriers to the effectiveness of any intervention in OA. *Bes Pract Res*  
38  
39 19 *Clin Rheumatol*. 2001;15:645-656.  
40  
41 20 43. Kolt GS, McEvoy JF. Adherence to rehabilitation in patients with low back pain.  
42  
43 21 *Man Ther*. 2003;8:110-116.  
44  
45 22 44. Butow P, Sharpe L. The impact of communication on adherence in pain  
46  
47 23 management. *Pain*. 2013;154:S101-S107.  
48  
49 24 45. Nicholas MK, Asghari A, Blyth FM. What do the numbers mean? Normative data  
50  
51 25 in chronic pain measures. *Pain*. 2008;134:158-173.  
52  
53  
54  
55  
56  
57  
58  
59  
60

- 1  
2  
3 1 46. Bair MJ, Robinson RL, Katon W, et al. Depression and pain comorbidity: A  
4  
5 2 literature review. *Arch Intern Med*. 2003;163:2433-2445.  
6  
7 3 47. Gayet-Ageron A, Agoritsas T, Schiesari L, et al. Barriers to participation in a  
8  
9 4 patient satisfaction survey: who are we missing? *PLoS One*. 2011;6:e26852.  
10  
11 5 48. Williams A, Manias E, Liew D, et al. Working with CALD groups: testing the  
12  
13 6 feasibility of an intervention to improve medication self-management in people with  
14  
15 7 kidney disease, diabetes, and cardiovascular disease. *Ren Soc Australas J*.  
16  
17 8 2012;8:62-69.  
18  
19 9 49. Swerissen H, Belfrage J, Weeks A, et al. A randomised control trial of a self-  
20  
21 10 management program for people with a chronic illness from Vietnamese, Chinese,  
22  
23 11 Italian and Greek backgrounds. *Patient Educ Couns*. 2006;64:360-368.  
24  
25 12 50. Bollen JC, Dean SG, Siegert RJ, et al. A systematic review of measures of self-  
26  
27 13 reported adherence to unsupervised home-based rehabilitation exercise  
28  
29 14 programmes, and their psychometric properties. *BMJ Open*. 2014;4:e005044.  
30  
31  
32  
33  
34  
35  
36  
37  
38  
39  
40  
41  
42  
43  
44  
45  
46  
47  
48  
49  
50  
51  
52  
53  
54  
55  
56  
57  
58  
59  
60

1  
2  
3 1 Figure 1 Flow diagram of the study following Consolidated Standards of Reporting

4  
5 2 Trial guidelines.

6  
7 3  
8  
9  
10  
11  
12  
13  
14  
15  
16  
17  
18  
19  
20  
21  
22  
23  
24  
25  
26  
27  
28  
29  
30  
31  
32  
33  
34  
35  
36  
37  
38  
39  
40  
41  
42  
43  
44  
45  
46  
47  
48  
49  
50  
51  
52  
53  
54  
55  
56  
57  
58  
59  
60

For peer review only



1 **Table 1 Participant Baseline Demographic and Symptom Characteristics**

2

|                                                       | <b>Culturally adapted</b> | <b>Usual Care</b> |
|-------------------------------------------------------|---------------------------|-------------------|
|                                                       | <b>(n = 24)</b>           | <b>(n = 24)</b>   |
| <b>Age (years)</b>                                    | 55 (10.0)                 | 54 (10.9)         |
| <b>Sex, (n) Male: Female</b>                          | 5:19                      | 4:20              |
| <b>Length of time in Australia, years</b>             | 15.5 (12.9)               | 14.0 (10.1)       |
| <b>Migration circumstances</b>                        |                           |                   |
| Voluntary migrant, n (%)                              | 6 (25%)                   | 8 (33%)           |
| Refugee, n (%)                                        | 18 (75%)                  | 16 (67%)          |
| <b>Marital status - Married n (%)</b>                 | 16 (67%)                  | 18 (75%)          |
| <b>Level of education</b>                             |                           |                   |
| No school or primary, n                               | 9 (38%)                   | 7 (29%)           |
| Secondary, n                                          | 13 (54%)                  | 13 (54%)          |
| Tertiary, n                                           | 2 (8%)                    | 4 (17%)           |
| <b>Duration of Pain (years)</b>                       | 10.0 (7.9)                | 8.5 (7.3)         |
| <b>Work status</b>                                    |                           |                   |
| Full or part-time work, n                             | 1 (4%)                    | 2 (8.3%)          |
| Unemployed due to pain, n                             | 18 (75%)                  | 18 (75%)          |
| Retired, n                                            | 2 (8%)                    | 2 (8.3%)          |
| Other, n                                              | 3 (13%)                   | 2 (8.3%)          |
| <b>Receiving pension or benefit, n (%)</b>            | 23 (96%)                  | 22 (92%)          |
| <b>Mean classes of pain medication<sup>#</sup> /5</b> | 2.08 (0.78)               | 2.08 (0.72)       |
| <b>BPI (Pain Severity) /10</b>                        | 7.3 (1.8)                 | 7.4 (1.3)         |
| <b>BPI (Pain Interference) /10</b>                    | 7.7 (1.6)                 | 7.1 (1.3)         |
| <b>DASS Sub-scores /42</b>                            |                           |                   |
| Depression                                            | 27.6 (12.2)               | 26.0 (9.8)        |
| Anxiety                                               | 23.9 (12.4)               | 23.5 (10.2)       |
| Stress                                                | 26.8 (11.4)               | 28.8 (8.3)        |

|                                   |               |               |
|-----------------------------------|---------------|---------------|
| <b>Pain Suffering (PRISM) /27</b> | 3.4 (5.0)     | 5.2 (6.4)     |
| <b>6MWT</b>                       | 266.8 (142.3) | 265.3 (108.7) |
| <b>1 min STS test</b>             | 9.6 (6.5)     | 9.4 (6.9)     |

1 Data are presented as mean ( $\pm$ SD) unless otherwise indicated

2 n = Number of participants % = Percentage within the group

3 BPI = Brief Pain Inventory DASS = Depression, Anxiety and Stress Scale

4 6MWT = Six-minute walk test 1 min STS test = 1-minute sit to stand test

5 PRISM = Pictorial Representation of Illness and Self Measure Separation

6 #Classes included simple analgesics, compound analgesics, anti-inflammatory, anti-convulsant and  
7 opioids.

8

1  
2  
3  
4  
5 **Table 2 Between-group comparison**  
6  
7

|                                           | ANOVA                              |                |                  |       |
|-------------------------------------------|------------------------------------|----------------|------------------|-------|
|                                           | Time x Group                       |                |                  |       |
| Between-group comparison of change scores | F (1,46) value                     | <i>p value</i> | partial $\eta^2$ |       |
| Culture – Usual                           |                                    |                |                  |       |
| Mean (95% CI)                             |                                    |                |                  |       |
| BPI Pain Severity                         | -0.14 (-1.25 to 0.97) <sup>^</sup> | 0.063          | 0.803            | 0.001 |
| BPI Pain Interference‡                    | -0.57 (-1.73 to 0.60) <sup>^</sup> | 0.962          | 0.332            | 0.020 |
| Pain-Self Separation‡                     | 3.56 (0.11 to 7.0)                 | 4.322          | 0.043*           | 0.086 |
| 6MWT (m)                                  | 28.44 (-7.40 to 64.28)             | 2.551          | 0.117            | 0.053 |
| STS test (reps)                           | 1.13 (-2.44 to 4.69)               | 0.405          | 0.528            | 0.009 |
| DASS Depression                           | -2.67 (-9.03 to 3.69) <sup>^</sup> | 0.712          | 0.403            | 0.015 |
| DASS Anxiety                              | -2.0 (-8.28 to 4.28) <sup>^</sup>  | 0.411          | 0.524            | 0.009 |
| DASS Stress                               | 0.58 (-4.80 to 5.97) <sup>^</sup>  | 0.048          | 0.828            | 0.001 |

34 3 <sup>^</sup>Minus score in favour of experimental group      \**p* is significant at the 0.05 level      ‡ Transformed data  
35 4 BPI: Brief Pain Inventory      6MWT: Six-minute walk test      STS test: 1 minute sit to stand test reps: repetitions  
36 5 DASS: Depression, Anxiety and Stress Scale  
37 6

Figure 1

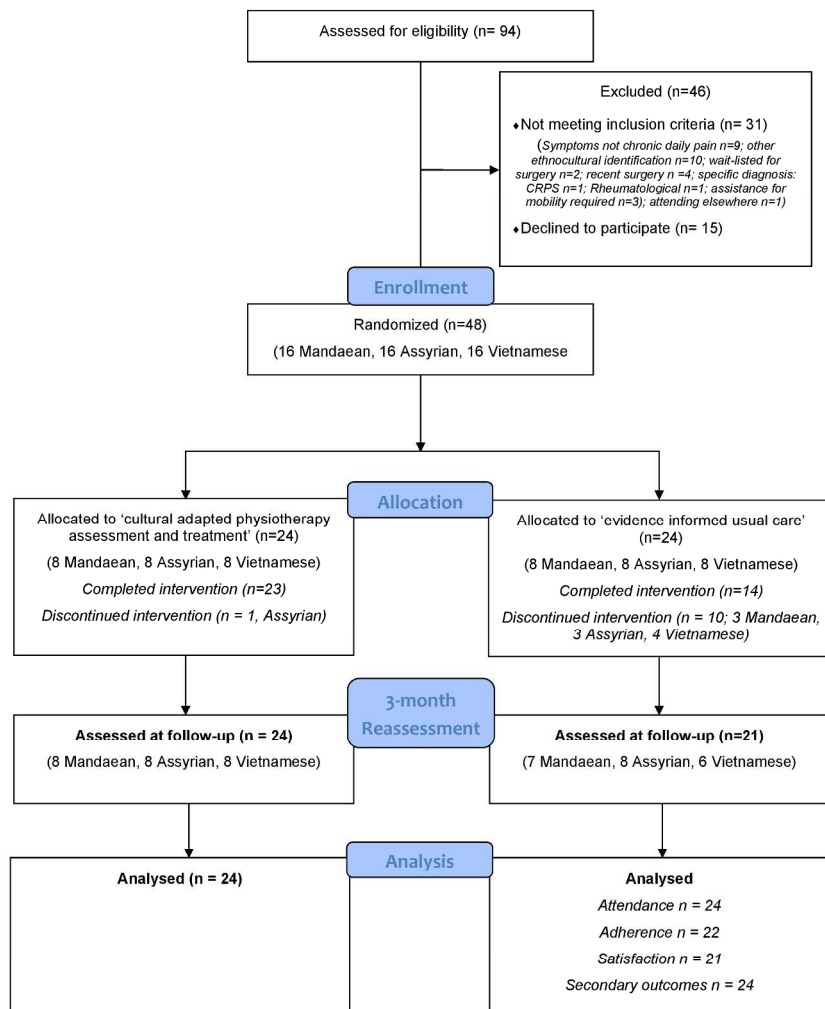

Figure 1 Flow diagram of the study following Consolidated Standards of Reporting Trial guidelines.

215x279mm (300 x 300 DPI)

## Appendix One Examples of culturally adapted elements

|                  | Mandaean                                                                                                                                                                                                                                                 | Assyrian                                                                                                                                                                                                                            | Vietnamese                                                                                                                                                                                                                                                   |
|------------------|----------------------------------------------------------------------------------------------------------------------------------------------------------------------------------------------------------------------------------------------------------|-------------------------------------------------------------------------------------------------------------------------------------------------------------------------------------------------------------------------------------|--------------------------------------------------------------------------------------------------------------------------------------------------------------------------------------------------------------------------------------------------------------|
| <b>Language</b>  | Program content to be delivered in Iraqi Arabic and program materials translated into Arabic and reviewed by a Mandaean community member and health worker.                                                                                              | Program content to be delivered in Assyrian language. Materials translated into Arabic (reflective of the reading/writing language of the Iraqi Assyrian community) and reviewed by an Assyrian community member and health worker. | Program content and materials to be delivered and translated into Vietnamese and reviewed by a Vietnamese community member and health worker.                                                                                                                |
| <b>Persons</b>   | Delivered by an Arabic multicultural health worker* and the physiotherapist who developed the culturally adapted approaches, with guest speakers from the Mandaean community.                                                                            | Delivered by an Assyrian multicultural health worker* and the physiotherapist who developed the culturally adapted approaches with guest speakers from the Assyrian community.                                                      | Delivered by a Vietnamese multicultural health worker* and the physiotherapist who developed the culturally adapted approaches with input from the Vietnamese community in traditional health practices.                                                     |
| <b>Metaphors</b> | Water, an important ethnoreligious symbol for Mandaeans, utilised as a metaphor and tool in sessions for rejuvenation of the self and a means of connecting with spiritual supports.                                                                     | The giving and sharing of food will be integrated into sessions as a metaphor and means for community connectedness and support.                                                                                                    | Traditional Vietnamese proverbs incorporated as “take home messages” for each session, providing a means for the sharing of advice in non-confrontational ways.                                                                                              |
| <b>Content</b>   | Culturally specific case examples will be used to communicate concepts such as pacing and graded exposure. Spiritual relaxation methods will be incorporated as part of physical and emotional pain coping strategies. Culturally specific music will be | Culturally specific case examples will be used to communicate concepts of pacing and graded exposure. Traditional Assyrian dance will form the basis for exercise components.                                                       | Traditional medicine components will be incorporated into pain reliving strategies. Exercise, activity and pacing will be framed with an emphasis of Am-Duong Harmony. Exercises will be categorised for participants as either Am or Duong and participants |

|                 |                                                                                                                                                                                                                                                                                                                                                 |                                                                                                                                                                                                                                      |                                                                                                                                                                                                                                                      |
|-----------------|-------------------------------------------------------------------------------------------------------------------------------------------------------------------------------------------------------------------------------------------------------------------------------------------------------------------------------------------------|--------------------------------------------------------------------------------------------------------------------------------------------------------------------------------------------------------------------------------------|------------------------------------------------------------------------------------------------------------------------------------------------------------------------------------------------------------------------------------------------------|
|                 | used to facilitate exercise sessions.                                                                                                                                                                                                                                                                                                           |                                                                                                                                                                                                                                      | encouraged to focus on achieving balance/harmony with their programs.                                                                                                                                                                                |
| <b>Concepts</b> | Biopsychosocial-spiritual theoretical construct underpins the program content, as informed by focus group findings                                                                                                                                                                                                                              | Biomedical theoretic construct underpins the adaptation of the program content and its delivery to participants, according to the focus group findings.                                                                              | Traditional Am-Duong Medicine construct underpins the adaptation of the program content and its delivery to participants, according to the focus group findings.                                                                                     |
| <b>Goals</b>    | Focused on fulfilment of traditional cultural roles and expectations. For example, goals for women will focus around ability to fulfil the role of carer and adhere to the Mandaean customs (such as prayer and food preparation customs).                                                                                                      | Focused on fulfilment of traditional cultural roles and expectations. For example, goals for women will focus on ability to prepare and share traditional Assyrian food with family, relatives and friends.                          | Focused on fulfilment of traditional cultural roles and expectations. For example, goals for men will focus on setting an example for the children, building self-management strategies in order to avoid burdening the family or displaying pain.   |
| <b>Methods</b>  | Drawing on the strength of the three collectivist communities by encouraging group sharing, bringing family/friends along to the sessions and inviting community members to share their experiences and knowledge. The programs are designed to be delivered in a large community hall or group room that is located central to each community. |                                                                                                                                                                                                                                      |                                                                                                                                                                                                                                                      |
| <b>Context</b>  | Recognising the social, environmental, political and economic context this community experienced their pain as refugees. Links and references to community support structures such as migrant resource centres, community social programs and other health services.                                                                            | Recognising the social, environmental, political and economic context this community experienced their pain. Links and references the Assyrian Resource Centre, community social and religious activities and other health services. | Recognising the social, environmental, political and economic context this community experienced their pain. Links to community supports and facilitative programs such as meditation classes and public accessible exercise programs (eg. tai chi). |

Table reproduced with permission from Brady et al 2017<sup>22</sup>

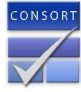

## CONSORT 2010 checklist of information to include when reporting a pilot or feasibility randomized trial in a journal or conference abstract

| Item               | Description                                                                                                 | Reported on line number                   |
|--------------------|-------------------------------------------------------------------------------------------------------------|-------------------------------------------|
| Title              | Identification of study as randomised pilot or feasibility trial                                            | Page 1, line 2                            |
| Authors *          | Contact details for the corresponding author                                                                | Page 1, lines 17-21                       |
| Trial design       | Description of pilot trial design (eg, parallel, cluster)                                                   | Page 3, line 9                            |
| Methods            |                                                                                                             |                                           |
| Participants       | Eligibility criteria for participants and the settings where the pilot trial was conducted                  | Page 3 lines 11-12 and 14-16              |
| Interventions      | Interventions intended for each group                                                                       | Page 3, lines 18-21                       |
| Objective          | Specific objectives of the pilot trial                                                                      | Page 3, lines 6-7                         |
| Outcome            | Prespecified assessment or measurement to address the pilot trial objectives**                              | Page 3, lines 23-24 and page 4, lines 1-2 |
| Randomization      | How participants were allocated to interventions                                                            | Page 9, lines 11-16                       |
| Blinding (masking) | Whether or not participants, care givers, and those assessing the outcomes were blinded to group assignment | Page 3, line 9                            |
| Results            |                                                                                                             |                                           |
| Numbers randomized | Number of participants screened and randomised to each group for the pilot trial objectives**               | Page 3, lines 14; 18-19                   |
| Recruitment        | Trial status†                                                                                               | N/A                                       |
| Numbers analysed   | Number of participants analysed in each group for the pilot objectives**                                    | Figure 1, Page 14, lines 15-20            |
| Outcome            | Results for the pilot objectives, including any expressions of uncertainty**                                | Page 3, lines 4-10                        |
| Harms              | Important adverse events or side effects                                                                    | Page 15, lines 12-13                      |
| Conclusions        | General interpretation of the results of pilot trial and their implications for the future definitive trial | Page 3, lines 12-15                       |
| Trial registration | Registration number for pilot trial and name of trial register                                              | Page 3, lines 17-18                       |
| Funding            | Source of funding for pilot trial                                                                           | Page 4, lines 10-173                      |

Citation: Eldridge SM, Chan CL, Campbell MJ, Bond CM, Hopewell S, Thabane L, et al. CONSORT 2010 statement: extension to randomised pilot and feasibility trials. *BMJ*. 2016;355.

*\*this item is specific to conference abstracts*

*\*\*Space permitting, list all pilot trial objectives and give the results for each. Otherwise, report those that are a priori agreed as the most important to the decision to proceed with the future definitive RCT.*

*†For conference abstracts.*

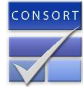

## CONSORT 2010 checklist of information to include when reporting a pilot or feasibility trial\*

| Section/Topic             | Item No | Checklist item                                                                                                                                               | Reported on page No                         |
|---------------------------|---------|--------------------------------------------------------------------------------------------------------------------------------------------------------------|---------------------------------------------|
| <b>Title and abstract</b> |         |                                                                                                                                                              |                                             |
|                           | 1a      | Identification as a pilot or feasibility randomised trial in the title                                                                                       | Page 2, lines 1-2                           |
|                           | 1b      | Structured summary of pilot trial design, methods, results, and conclusions (for specific guidance see CONSORT abstract extension for pilot trials)          | Page 2-3 and attached checklist             |
| <b>Introduction</b>       |         |                                                                                                                                                              |                                             |
| Background and objectives | 2a      | Scientific background and explanation of rationale for future definitive trial, and reasons for randomised pilot trial                                       | Pages 6-8                                   |
|                           | 2b      | Specific objectives or research questions for pilot trial                                                                                                    | Page 8, lines 1-10                          |
| <b>Methods</b>            |         |                                                                                                                                                              |                                             |
| Trial design              | 3a      | Description of pilot trial design (such as parallel, factorial) including allocation ratio                                                                   | Page 8, lines 14-17 and page 9, lines 12-14 |
|                           | 3b      | Important changes to methods after pilot trial commencement (such as eligibility criteria), with reasons                                                     | Page 14, lines 9-20                         |
| Participants              | 4a      | Eligibility criteria for participants                                                                                                                        | Page 9, lines 1-9                           |
|                           | 4b      | Settings and locations where the data were collected                                                                                                         | Page 8, lines 17-19                         |
|                           | 4c      | How participants were identified and consented                                                                                                               | Page 9, lines 2-9                           |
| Interventions             | 5       | The interventions for each group with sufficient details to allow replication, including how and when they were actually administered                        | Page 10-11                                  |
| Outcomes                  | 6a      | Completely defined prespecified assessments or measurements to address each pilot trial objective specified in 2b, including how and when they were assessed | Page 11, lines 17-23 and                    |



|                                                      |     |                                                                                                                                                                                             |                         |
|------------------------------------------------------|-----|---------------------------------------------------------------------------------------------------------------------------------------------------------------------------------------------|-------------------------|
|                                                      |     |                                                                                                                                                                                             | page 12.                |
|                                                      | 6b  | Any changes to pilot trial assessments or measurements after the pilot trial commenced, with reasons                                                                                        | N/A                     |
|                                                      | 6c  | If applicable, prespecified criteria used to judge whether, or how, to proceed with future definitive trial                                                                                 | Page 12, lines 1-13     |
| Sample size                                          | 7a  | Rationale for numbers in the pilot trial                                                                                                                                                    | Page 13, lines 10-15    |
|                                                      | 7b  | When applicable, explanation of any interim analyses and stopping guidelines                                                                                                                | N/A                     |
| Randomisation:                                       |     |                                                                                                                                                                                             |                         |
| Sequence generation                                  | 8a  | Method used to generate the random allocation sequence                                                                                                                                      | Page 9, lines 12-16     |
|                                                      | 8b  | Type of randomisation(s); details of any restriction (such as blocking and block size)                                                                                                      | Page 9, lines 13        |
| Allocation concealment mechanism                     | 9   | Mechanism used to implement the random allocation sequence (such as sequentially numbered containers), describing any steps taken to conceal the sequence until interventions were assigned | Page 9, line 15         |
| Implementation                                       | 10  | Who generated the random allocation sequence, who enrolled participants, and who assigned participants to interventions                                                                     | Page 9, lines 14-16     |
| Blinding                                             | 11a | If done, who was blinded after assignment to interventions (for example, participants, care providers, those assessing outcomes) and how                                                    | Page 9, lines 15-22     |
|                                                      | 11b | If relevant, description of the similarity of interventions                                                                                                                                 | N/A                     |
| Statistical methods                                  | 12  | Methods used to address each pilot trial objective whether qualitative or quantitative                                                                                                      | Page 13 and 14          |
| <b>Results</b>                                       |     |                                                                                                                                                                                             |                         |
| Participant flow (a diagram is strongly recommended) | 13a | For each group, the numbers of participants who were approached and/or assessed for eligibility, randomly assigned, received intended treatment, and were assessed for each objective       | Figure 1 and page 14-15 |
|                                                      | 13b | For each group, losses and exclusions after randomisation, together with reasons                                                                                                            | Page 15, lines 5-13     |
| Recruitment                                          | 14a | Dates defining the periods of recruitment and follow-up                                                                                                                                     | Page 14, lines 15-18    |
|                                                      | 14b | Why the pilot trial ended or was stopped                                                                                                                                                    | Page 14-15              |
| Baseline data                                        | 15  | A table showing baseline demographic and clinical characteristics for each group                                                                                                            | Table 1                 |
| Numbers analysed                                     | 16  | For each objective, number of participants (denominator) included in each analysis. If relevant, these numbers should be by randomised group                                                | Page 15-16 and Table 1, |

|                          |     |                                                                                                                                                                                |                                                                                         |
|--------------------------|-----|--------------------------------------------------------------------------------------------------------------------------------------------------------------------------------|-----------------------------------------------------------------------------------------|
|                          |     |                                                                                                                                                                                | Table 2                                                                                 |
| Outcomes and estimation  | 17  | For each objective, results including expressions of uncertainty (such as 95% confidence interval) for any estimates. If relevant, these results should be by randomised group | Table 2                                                                                 |
| Ancillary analyses       | 18  | Results of any other analyses performed that could be used to inform the future definitive trial                                                                               | Page 17, lines 4-14                                                                     |
| Harms                    | 19  | All important harms or unintended effects in each group (for specific guidance see CONSORT for harms)                                                                          | Page 15, line 12-13                                                                     |
|                          | 19a | If relevant, other important unintended consequences                                                                                                                           | n/a                                                                                     |
| <b>Discussion</b>        |     |                                                                                                                                                                                |                                                                                         |
| Limitations              | 20  | Pilot trial limitations, addressing sources of potential bias and remaining uncertainty about feasibility                                                                      | Page 21-22                                                                              |
| Generalisability         | 21  | Generalisability (applicability) of pilot trial methods and findings to future definitive trial and other studies                                                              | Page 20-21                                                                              |
| Interpretation           | 22  | Interpretation consistent with pilot trial objectives and findings, balancing potential benefits and harms, and considering other relevant evidence                            | Page 17-21                                                                              |
|                          | 22a | Implications for progression from pilot to future definitive trial, including any proposed amendments                                                                          | Page 20, lines 3-11<br>Page 21, lines 1-5<br>Page 21, lines 16-18<br>Page 22, lines 5-8 |
| <b>Other information</b> |     |                                                                                                                                                                                |                                                                                         |
| Registration             | 23  | Registration number for pilot trial and name of trial registry                                                                                                                 | Page 3, lines 17-18                                                                     |
| Protocol                 | 24  | Where the pilot trial protocol can be accessed, if available                                                                                                                   | Page 5, lines 5-9                                                                       |
| Funding                  | 25  | Sources of funding and other support (such as supply of drugs), role of funders                                                                                                | Page 4, lines 10-17                                                                     |
|                          | 26  | Ethical approval or approval by research review committee, confirmed with reference number                                                                                     | Page 5, lines 1-3                                                                       |

Citation: Eldridge SM, Chan CL, Campbell MJ, Bond CM, Hopewell S, Thabane L, et al. CONSORT 2010 statement: extension to randomised pilot and feasibility trials. BMJ. 2016;355.

1  
2  
3  
4  
5  
6  
7  
8  
9  
10  
11  
12  
13  
14  
15  
16  
17  
18  
19  
20  
21  
22  
23  
24  
25  
26  
27  
28  
29  
30  
31  
32  
33  
34  
35  
36  
37  
38  
39  
40  
41  
42  
43  
44  
45  
46  
47

\*We strongly recommend reading this statement in conjunction with the CONSORT 2010, extension to randomised pilot and feasibility trials, Explanation and Elaboration for important clarifications on all the items. If relevant, we also recommend reading CONSORT extensions for cluster randomised trials, non-inferiority and equivalence trials, non-pharmacological treatments, herbal interventions, and pragmatic trials. Additional extensions are forthcoming: for those and for up to date references relevant to this checklist, see [www.consort-statement.org](http://www.consort-statement.org).

For peer review only

# BMJ Open

## Integrating culturally informed approaches into physiotherapy assessment and treatment of chronic pain: a pilot randomised controlled trial

|                                 |                                                                                                                                                                                                                                                                                                                                                                                                |
|---------------------------------|------------------------------------------------------------------------------------------------------------------------------------------------------------------------------------------------------------------------------------------------------------------------------------------------------------------------------------------------------------------------------------------------|
| Journal:                        | <i>BMJ Open</i>                                                                                                                                                                                                                                                                                                                                                                                |
| Manuscript ID                   | bmjopen-2018-021999.R1                                                                                                                                                                                                                                                                                                                                                                         |
| Article Type:                   | Research                                                                                                                                                                                                                                                                                                                                                                                       |
| Date Submitted by the Author:   | 17-Apr-2018                                                                                                                                                                                                                                                                                                                                                                                    |
| Complete List of Authors:       | Brady, Bernadette; Liverpool Hospital, Departments of Pain Medicine and Physiotherapy; Western Sydney University School of Science and Health, Veljanova, Irena; Western Sydney University, School of Social Science and Psychology<br>Schabrun, Siobhan; Western Sydney University School of Science and Health<br>Chipchase, Lucinda; Western Sydney University School of Science and Health |
| <b>Primary Subject Heading</b>: | Health services research                                                                                                                                                                                                                                                                                                                                                                       |
| Secondary Subject Heading:      | Patient-centred medicine, Rehabilitation medicine                                                                                                                                                                                                                                                                                                                                              |
| Keywords:                       | Cultural diversity, chronic pain, Physical Therapy Speciality, Cultural competency                                                                                                                                                                                                                                                                                                             |
|                                 |                                                                                                                                                                                                                                                                                                                                                                                                |

SCHOLARONE™  
Manuscripts

only

1  
2  
3  
4  
5  
6  
7  
8  
9  
10  
11  
12  
13  
14  
15  
16  
17  
18  
19  
20  
21  
22  
23  
24  
25  
26  
27  
28  
29  
30  
31  
32  
33  
34  
35  
36  
37  
38  
39  
40  
41  
42  
43  
44  
45  
46  
47  
48  
49  
50  
51  
52  
53  
54  
55  
56  
57  
58  
59  
60

1 Title: Integrating culturally informed approaches into physiotherapy assessment and  
2 treatment of chronic pain: a pilot randomised controlled trial

3  
4 Authors:

5 Bernadette Brady<sup>1,2</sup>, Irena Veljanova<sup>3</sup>, Siobhan Schabrun<sup>1</sup>, Lucy Chipchase<sup>1</sup>.

6  
7 Affiliations:

8 <sup>1</sup>Western Sydney University, School of Science and Health, Locked Bag 1797,  
9 Penrith NSW 2751, Australia

10 <sup>2</sup>Liverpool Hospital Departments of Pain Medicine and Physiotherapy, Locked Bag  
11 7103 Liverpool, BC NSW 1871, Australia,

12 <sup>3</sup>Western Sydney University, School of Social Science and Psychology, Locked Bag  
13 1797, Penrith NSW 2751, Australia

14  
15 Word count: 3747 words

16  
17 Corresponding author: Bernadette Brady

18 Liverpool Hospital Department of Pain Medicine

19 Locked Bag 7103, Liverpool BC 1871, Australia

20 Phone: +61 2 87387200

Fax: +61 2 8738 7205

21 [Bernadette.brady@sswahs.nsw.gov.au](mailto:Bernadette.brady@sswahs.nsw.gov.au)

22  
23 **Key words:** Cultural diversity; Chronic pain; Physical Therapy Speciality; Cultural  
24 competency.

1 **Title:** Integrating culturally informed approaches into physiotherapy assessment and  
2 treatment of chronic pain: a pilot randomised controlled trial

3  
4 **Abstract**

5  
6 **Objective:** To evaluate patient engagement with, and the feasibility of, a novel,  
7 culturally adapted physiotherapy pain management approach

8  
9 **Design:** A participant- and assessor-blinded pilot randomised controlled trial

10  
11 **Setting:** Outpatient physiotherapy departments at two public hospitals and one  
12 district Pain Clinic.

13  
14 **Participants:** Adults ( $n=48$ ) with chronic musculoskeletal pain (daily pain >3-  
15 months), who self-identified as Mandaean, Assyrian or Vietnamese, were  
16 randomised to one of two physiotherapy treatment conditions.

17  
18 **Interventions:** Twenty-four participants underwent combined group and  
19 individualised treatment described as 'culturally adapted physiotherapy', while 24  
20 underwent evidence-informed 'usual physiotherapy care'. Both treatment arms  
21 consisted of up to 10 sessions over a 3-month period.

22  
23 **Outcome Measures:** Patient engagement was measured via participant attendance,  
24 adherence, and satisfaction data. Secondary outcomes included clinical measures of

1  
2  
3 1 pain severity, interference and suffering; physical function, and negative emotional  
4  
5 2 state.  
6

7  
8 3  
9 4 **Results:** Ninety-six percent of participants undergoing culturally adapted  
10  
11 5 physiotherapy completed treatment, compared with 58% of the usual physiotherapy  
12  
13 6 group. For the culturally adapted group attendance ( $87\% \pm 18$ ) and adherence ( $68\%$   
14  
15 7  $\pm 32$ ) were higher relative to usual care ( $68\% \pm 32$  and  $55\% \pm 43$ ). Satisfaction was  
16  
17 8 similar for the culturally adapted ( $82.7\% \pm 13.4$ ) and usual care ( $79.3 \pm 17.3$ ) groups.  
18  
19 9 For secondary outcomes, a significant between-group effect for pain-related  
20  
21 10 suffering in favour of the culturally adapted group was observed with a medium effect  
22  
23 11 size (partial  $\eta^2$  0.086, mean 3.56, 95% CI 0.11 to 7), while results for pain severity,  
24  
25 12 interference, physical function and negative emotional state were similar.  
26  
27  
28  
29  
30

31 14 **Conclusion(s):** Aligning treatment with the beliefs and values of CALD communities  
32  
33 15 enhances patient engagement with physiotherapy. These results support the  
34  
35 16 feasibility of a larger, multisite trial to determine if improved engagement with  
36  
37 17 culturally adapted physiotherapy translates to improved clinical outcomes.  
38  
39  
40

41 19 **Trial Registration:** This study was prospectively registered with the Australian and  
42  
43 20 New Zealand Clinical Trials Registry (ACTRN12616000857404).  
44  
45

46 21  
47  
48  
49  
50  
51  
52  
53  
54  
55  
56  
57  
58  
59  
60

## 1 **Strengths and limitations of this study**

- 2 • This was a randomised, assessor- and participant- blind controlled trial
- 3 • It provides evidence of feasibility of culturally adapted physiotherapy approaches  
4 for pain management as explored with three culturally and linguistically diverse  
5 communities
- 6 • Observed recruitment rates, follow-up rates and preliminary data can inform a  
7 future fully powered RCT
- 8 • As a pilot study, analysis of clinical outcomes are exploratory.

## 10 **Funding**

11 This work was supported by the Physiotherapy Research Foundation grant number  
12 S16-005. The development of the culturally adapted assessment protocols used in  
13 this trial was supported by a South West Sydney Local Health District and Ingham  
14 Institute Research Scholarship. BB is the recipient of a Sir Robert Menzies Memorial  
15 Research Scholarship in the Allied Health Sciences, from the Menzies Foundation,  
16 while SS receives salary support from the National Health and Medical Research  
17 Council of Australia (1105040).

## 19 **Conflict of interest**

20 All authors have completed the ICMJE uniform disclosure form at  
21 [www.icmje.org/coi\\_disclosure.pdf](http://www.icmje.org/coi_disclosure.pdf) and declare no conflicts of interest.

## 23 **Ethical Approval**



1  
2  
3  
4  
5  
6  
7  
8  
9  
10  
11  
12  
13  
14  
15  
16  
17  
18  
19  
20  
21  
22  
23  
24  
25  
26  
27  
28  
29  
30  
31  
32  
33  
34  
35  
36  
37  
38  
39  
40  
41  
42  
43  
44  
45  
46  
47  
48  
49  
50  
51  
52  
53  
54  
55  
56  
57  
58  
59  
60

1 The study was approved by the South West Sydney Local Health District (SWSLHD)  
2 Human Research Ethics Committee (HREC/16/LPOOL/194) and Western Sydney  
3 University Human Research Ethics Committee (RH11741).

#### 5 **Original protocol for the study**

6 Brady B, Veljanova I, Schabrun S, et al. Integrating culturally informed approaches  
7 into the physiotherapy assessment and treatment of chronic pain: protocol for a pilot  
8 randomised controlled trial. *BMJ Open* 2017;7(5):  
9 <http://bmjopen.bmj.com/content/7/5/e014449>.

10

For peer review only

## 1 **Introduction**

2  
3  
4  
5  
6  
7 Patient engagement is paramount for the delivery of efficient and effective  
8 healthcare, reflecting a patients' relationship with the health encounter, such that  
9 they participate (attends and adheres) and recognise value in their treatment  
10 (satisfaction and treatment completion).<sup>1 2</sup> Research that has evaluated interventions  
11 and models of care to enhance patient engagement has provided evidence of  
12 success.<sup>2</sup> Whether this is true for culturally and linguistically diverse (CALD)  
13 communities remains uncertain.<sup>1</sup> This is problematic because healthcare must be  
14 responsive to the comparatively poorer health status observed in many CALD  
15 communities.<sup>3</sup> Further, strategies promoting engagement tailored to the needs of  
16 CALD communities is vital, particularly given that many countries around the world  
17 are now culturally plural societies.

18  
19 Culturally adapted approaches have been suggested to be an effective strategy to  
20 enhance patient engagement and reduce health disparities in CALD communities.<sup>1 4</sup>  
21 Such approaches speak to more equitable health outcomes for diverse cultures by  
22 minimising the risk of a model that results in more favourable outcomes for the  
23 dominant, hegemonic culture.<sup>4</sup> Systematic reviews and meta-analyses support the  
24 use of culturally adapted treatment for mental health conditions, chronic disease  
25 management, cancer screening, and health promotion.<sup>4-8</sup> For example, meta-  
analyses of mental health interventions demonstrated small to large pooled effect  
sizes in favour of culturally adapted treatments, compared to usual care.<sup>5 6 9</sup> Despite  
evidence supporting the use of culturally-adaptive approaches, research is still  
lacking for many prominent, debilitating conditions, including for chronic pain.<sup>10</sup> As

1  
2  
3 1 such, suboptimal health outcomes continue to be observed in patients from CALD  
4  
5 2 communities with chronic pain.  
6  
7 3  
8  
9 4 Chronic pain disorders contribute to considerable societal burden and personal  
10  
11 5 suffering.<sup>11</sup> Many physiotherapy interventions for chronic pain, particularly exercise  
12  
13 6 based approaches, are safe and effective.<sup>12 13</sup> Current evidenced based  
14  
15 7 recommendations suggest that exercise, when combined with cognitive behavioural  
16  
17 8 and psychosocial treatments, reduces pain, improves quality of life, and reduces  
18  
19 9 long term disability.<sup>12 14</sup> However, the efficacy of these approaches has been  
20  
21 10 established in populations speaking the same language, with few studies including  
22  
23 11 CALD and migrant communities.<sup>10</sup> The limited research inclusive of CALD  
24  
25 12 communities suggests limited efficacy for pain, quality of life and psychological  
26  
27 13 health outcomes.<sup>10</sup> Such uncertainty supports investigation of sociocultural factors  
28  
29 14 that could influence implementation of pain management approaches within CALD  
30  
31 15 communities.<sup>15</sup>  
32  
33  
34  
35 16  
36  
37 17 Successful management of chronic pain requires a strong therapeutic alliance and  
38  
39 18 patient acceptance of, and engagement with, treatment concepts.<sup>16 17</sup> Unfortunately,  
40  
41 19 engagement with activity based treatments is often suboptimal in CALD  
42  
43 20 communities, evidenced by lower attendance, reduced acceptance, and premature  
44  
45 21 drop-out from treatment.<sup>10 18</sup> Discordant expectations, low patient-provider alliance,  
46  
47 22 cultural-spiritual factors and communication problems have been cited as  
48  
49 23 contributors to suboptimal engagement for CALD communities.<sup>19 20</sup> This is perhaps  
50  
51 24 not surprising in the context of intercultural encounters where there is evidence of  
52  
53 25 healthcare provider ethnocentrism, implicit and explicit bias towards patients from  
54  
55  
56  
57  
58  
59  
60

1 CALD backgrounds.<sup>21-23</sup> Since engagement with treatment underpins improved  
2 patient outcomes,<sup>24</sup> it is imperative that strategies are implemented to optimise  
3 engagement by CALD populations for costly and debilitating conditions, such as  
4 chronic pain.

5  
6 Thus, the aim of this pilot study was to determine the feasibility, patient engagement,  
7 and trends of clinical effectiveness of a culturally adapted physiotherapy assessment  
8 and treatment approach compared with evidence informed 'usual physiotherapy  
9 care'. Thus, the research questions for this pilot randomised trial were:

- 10 1. Is a 12 week culturally adapted treatment approach superior to 'usual  
11 physiotherapy care', in terms of patient engagement (adherence, attendance, and  
12 satisfaction)?
- 13 2. Is it feasible to deliver and evaluate culturally adapted physiotherapy assessment  
14 and treatment approaches across three CALD communities using a randomised  
15 controlled trial design?

## 17 **Methods**

### 19 *Design*

20 This was a prospective, multi-centre pilot randomized controlled trial with concealed  
21 allocation, and participant and assessor blinding, using a patient sample with chronic  
22 pain drawn from 3 CALD communities (Mandaeen, Assyrian and Vietnamese). The  
23 trial was conducted across 2 hospital-based physiotherapy departments and one  
24 district Pain Clinic, between July 2016 and June 2017. A study protocol with eligibility  
25 criteria and intervention descriptions was published previously.<sup>22</sup> The study was

1 approved by the South West Sydney Local Health District (SWSLHD) Human  
2 Research Ethics Committee (HREC/16/LPOOL/194), Western Sydney University  
3 Human Research Ethics Committee (RH11741) and was registered with the  
4 Australian and New Zealand Clinical Trials Registry (ACTRN12616000857404).

### 6 *Participants and Recruitment*

7 This pilot RCT was the culmination of three years of engagement with local Assyrian,  
8 Mandaean and Vietnamese communities, facilitated by the multicultural health unit in  
9 SWSLHD. Bilingual community educators and multicultural health workers informed  
10 the development of the intervention in earlier qualitative phases<sup>15</sup> and guided  
11 processes in this RCT, ensuring the research team were cognisant of the  
12 communities needs and vulnerabilities.

14 Following consultation with multicultural representatives it was evident that a broad  
15 recruitment strategy was required to be inclusive. This included: a) recognising the  
16 complexity of chronic pain in each community by not excluding participants based on  
17 pain location (such as only including low back pain) or psychological comorbidity; b)  
18 considering patients from multiple countries of birth (Iraq, Iran, Syria, Turkey, Jordan  
19 and Vietnam) and anyone speaking Arabic, Assyrian or Vietnamese as potentially  
20 eligible, especially where data on ethnocultural identification was not available.

21 Ethnocultural identification was then established according to self-identification by  
22 the participant at the screening assessment. A total of 94 participants were assessed  
23 for eligibility by a physiotherapist not involved in the delivery of interventions and who  
24 was bilingual or used the services of an accredited health language interpreter.

25 While a multicultural community representative was not present during recruitment,

1 participants were offered the opportunity to consult community representatives and  
2 family members before consenting to participation. This resulted in 48 participants  
3 randomised into the study. Inclusion criteria were: adult ( $\geq 18$  years), non-specific  
4 musculoskeletal pain, daily pain of greater than three months' duration, self-  
5 identification as a member of the Mandaean, Assyrian or Vietnamese ethnocultural  
6 communities, and ability to provide written informed consent in their own language or  
7 English. Exclusion criteria were: specific diagnoses necessitating other treatment  
8 (i.e. complex regional pain syndrome), surgery within the last 3-months, and  
9 assistance for mobility other than a walking stick, to ensure safety during a group or  
10 home-based exercise program.

11  
12 Sixteen participants from each community were allocated randomly to the  
13 experimental or control group after baseline assessment (Figure 1). Group allocation  
14 was determined by a computer-generated sequence with a 1:1 allocation ratio, with  
15 each ethnocultural community randomised separately. An independent person  
16 prepared sealed opaque envelopes containing the intervention arm, labelled with a  
17 participant number according to their entrance sequences. These envelopes were  
18 managed securely by a central administrative officer responsible for randomising  
19 participants and arranging relevant appointments once a participant had been  
20 consented. Participants were blind to treatment allocation and were told the trial was  
21 comparing two physiotherapy approaches for chronic pain and it was unknown which  
22 was more effective. Thus, participants were unaware they were receiving culturally  
23 adapted treatment approaches for the experimental groups. The success of blinding  
24 was assessed at the 3-month re-assessment with the question; "Do you think your

1  
2  
3 1 physiotherapist has been trained in culturally responsive treatments for chronic  
4  
5 2 pain?”.

6  
7 3  
8  
9 4 *Intervention*

10 5 Participants from Intervention and Control groups attended for a maximum of 10  
11  
12 6 sessions of physiotherapy over a 3-month treatment period. A maximum of ‘10’  
13  
14 7 sessions was selected to enable the treating physiotherapist to tailor interventions to  
15  
16 8 the individual needs of participants, and was consistent with the average number of  
17  
18 9 physiotherapy sessions reported in clinical trials for the management of chronic  
19  
20 10 pain.<sup>13 14</sup> All participants were given a home exercise program designed by their  
21  
22 11 physiotherapist, and they were provided with translated log-books to facilitate  
23  
24 12 recording of exercise adherence. A professional health interpreter was available for  
25  
26 13 all treatment sessions (group and individual), if required, in accordance with best  
27  
28 14 practice.

29  
30  
31  
32  
33  
34  
35  
36  
37 17 *i. Culturally adapted physiotherapy assessment and treatment*

38  
39 18 Participants received a combination of group and individual physiotherapy sessions,  
40  
41 19 adapted to reflect the ethnocultural beliefs and values of the community to which the  
42  
43 20 participant identified. Three ethnocultural-specific group programs were designed by  
44  
45 21 the research team, informed by qualitative research involving each community and  
46  
47 22 guided by two adaptation frameworks.<sup>15 25</sup> Sessions were delivered once per week  
48  
49 23 for 6-weeks, included a combination of education and exercise, and were conducted  
50  
51 24 in groups of 8 participants from the same ethnocultural community. Sessions were  
52  
53 25 run by a physiotherapist at a local community facility, and facilitated by a bilingual  
54  
55  
56  
57  
58  
59  
60

1 educator in the language of participants. In addition, group sessions were  
2 supplemented by up to 4 individual sessions tailored to the participant according to  
3 the culturally-informed initial assessment to ensure consistency with the dose of the  
4 control group. Components of the cultural adaptation for each ethnocultural  
5 community have been previously published and a summary is presented in Appendix  
6 1.<sup>25</sup>

#### 8 *ii. Evidence informed 'usual physiotherapy care'*

9 Participants allocated to this condition attended physiotherapy in the outpatient  
10 department where they were referred, for treatment informed by evidence based  
11 recommendations for chronic pain. All treating physiotherapists underwent a training  
12 session to familiarise them with evidence-based management of chronic pain.  
13 Treatment adherence to these guidelines was monitored by review of therapist  
14 treatment logs. Treating physiotherapists used their clinical judgement to guide the  
15 specifics of treatment according to principles of patient-centred care.<sup>26</sup> Following the  
16 initial assessment, physiotherapists worked with patients to select the treatment  
17 mode (individual or group based), frequency and dose (to a maximum of 10  
18 sessions) tailored to the patient's needs and goals, consistent with best available  
19 evidence.<sup>13 27</sup> It is of note that a substantial proportion of research examining the  
20 impact of interventions on chronic pain had excluded patients from CALD  
21 backgrounds.<sup>10</sup>

#### 23 *Outcomes*

24 Trained assessors, not involved in the recruitment or treatment of participants and  
25 unaware of group assignment, performed assessments according to standardised



1  
2  
3 1 instructions at baseline (Month 0), and 3-month reassessment). Success of assessor  
4  
5 2 blinding was determined with the question; “Did you know to which treatment arm the  
6  
7 3 participant belonged?” If an assessor responded “yes”, they were asked to nominate;  
8  
9 4 “to which group?”.

10  
11 5  
12  
13 6 Data to assess feasibility were collected throughout the trial period regarding  
14  
15 7 recruitment rates, treatment withdrawals, therapist fidelity to evidence-based  
16  
17 8 guidelines, success of participant and assessor blinding, and trial drop-outs. Primary  
18  
19 9 outcome measures were: measures of patient engagement, defined by attendance;  
20  
21 10 and adherence to, and satisfaction with treatment. Attendance was measured as the  
22  
23 11 proportion of sessions attended, relative to the number of sessions scheduled.  
24  
25 12 Adherence was calculated as a percentage of the average number of home exercise  
26  
27 13 sessions completed each week, relative to the number of sessions prescribed,  
28  
29 14 determined from participant log-books or self-report (where the participant was  
30  
31 15 unable or did not complete the log-book).<sup>28</sup> Patient satisfaction with treatment was  
32  
33 16 evaluated using the Client Satisfaction Questionnaire (CSQ-8),<sup>29</sup> which evaluates  
34  
35 17 satisfaction with treatment generally, and was selected because it validated in Arabic  
36  
37 18 and Vietnamese.

38  
39  
40  
41  
42 19  
43  
44 20 Secondary outcomes included core measures recommended by the Initiative on  
45  
46 21 Methods, Measurement, and Pain Assessment in Clinical Trials (IMMPACT).<sup>30</sup> This  
47  
48 22 included measures for pain severity and interference (Brief Pain Inventory: BPI),<sup>31</sup>  
49  
50 23 pain-related suffering (Pictorial Representation of Illness and Self Measure:  
51  
52 24 PRISM),<sup>32</sup> physical function (6-minute walk test: 6MWT, and 1 minute sit to stand  
53  
54 25 test: STS test)<sup>33 34</sup> and severity of symptoms for Depression, Anxiety, and Stress

1 (DASS-21).<sup>35</sup> The reliability and validity of these measures, including for Arabic and  
2 Vietnamese translations, has been reported previously and was documented in the  
3 trial protocol.<sup>25</sup>

#### 4 5 *Patient involvement*

6 The research questions were developed following qualitative enquiry into the  
7 experience of chronic pain among CALD communities.<sup>15</sup> Specifically, challenges  
8 raised by participants accessing and participating in pain management in South-  
9 West Sydney were incorporated in the study design. As such, participant  
10 engagement was considered a primary outcome measure. While patients were not  
11 involved in the recruitment and conduct of the study, all participants were given the  
12 opportunity to attend a feedback session following trial completion, held in local  
13 community venues.

#### 14 15 *Sample Size and Statistical Analysis*

16 A total sample of 48 participants was deemed appropriate to allow the piloting of a  
17 novel culturally adapted program with 3 communities (8 participants per program),  
18 while ensuring equal numbers in both treatment arms (24 culturally adapted and 24  
19 usual care) and allowing for the detection of medium to large effects (effect sizes of  
20 0.5-0.8), should they exist.<sup>36 37</sup>

21  
22 Descriptive statistics were used to report the characteristics of participants, including  
23 means and standard deviations (SDs) for continuous variables, and frequencies and  
24 proportions (%) for categorical variables. Primary outcome measures (attendance,  
25 adherence and satisfaction) were evaluated using descriptive statistics and Mann-

1  
2  
3 1 Whitney U tests, because data were not normally distributed and transformations did  
4  
5 2 not achieve normality. Effect sizes for non-parametric tests were reported using  $r$   
6  
7 3 and interpreted as large (0.5), medium (0.3) and small (0.1).<sup>38</sup>  
8  
9 4

10 5 Exploratory examination for group differences in secondary outcome measures was  
11  
12 6 undertaken using a repeated-measures analysis of variance (ANOVA), with the  
13  
14 7 treatment condition (usual care/culturally adapted intervention) as the between-group  
15  
16 8 factor, and time of assessment (pre-intervention or re-assessment) as the repeated,  
17  
18 9 within-group factor. One-way repeated measures ANOVAs compared within-group  
19  
20 10 main effects at each time point. Effect sizes were classified as small, medium or  
21  
22 11 large (partial  $\eta^2$  0.01, 0.06, 0.14, respectively).<sup>39</sup> If the assumptions of ANOVA were  
23  
24 12 violated, data were transformed to achieve a normal distribution<sup>40</sup> before repeating  
25  
26 13 the ANOVA. Intention-to treat analyses were performed for all participants and  
27  
28 14 missing data were addressed by carrying the last data point forward.<sup>41</sup> Analyses  
29  
30 15 were performed using the Statistical Package for the Social Sciences, Version 24.  
31  
32  
33  
34  
35  
36  
37

## 38 **Results**

### 39 *Feasibility and treatment characteristics*

40  
41 19 Forty-eight participants, 16 from each ethnocultural community, were randomised  
42  
43 20 within 4 months (Figure 1). For the culturally adapted treatment arm, all group  
44  
45 21 sessions were delivered by the physiotherapist who developed the culturally adapted  
46  
47 22 treatment protocols, according to the session manual, and verified by review of the  
48  
49 23 therapist log-book. On average, 3 individual sessions were recommended to  
50  
51 24 supplement the 6 group sessions (range 1-4). One participant discontinued  
52  
53 25 treatment prematurely, citing illness. For the usual care arm, 14 participants  
54  
55  
56  
57  
58  
59  
60

1 completed the treatment they were allocated. Ten participants withdrew from  
2 treatment citing reasons that included illness ( $n=1$ ), treatment not helping ( $n=4$ ), lack  
3 of time ( $n=1$ ), and changed mind/ sought care elsewhere ( $n=4$ ). Treating  
4 physiotherapists in the usual care arm utilised both group and individual modes of  
5 delivery for 8/24 participants, while individual therapy alone was recommended for  
6 16 participants. Fidelity was evaluated from logbooks completed by each therapist as  
7 the percentage of core treatment components included. The components included  
8 pain education, goal setting, activity pacing, active coping strategies, flare-up  
9 management and a tailored home exercise program. For the 14 participants who  
10 completed treatment, there was 100% therapist fidelity to 6 core treatment  
11 components while for the other participants, an average of 4 of the 6 core  
12 components were included prior to drop-out, with flare up management and active  
13 coping strategies the most commonly omitted elements. Therapist fidelity to  
14 evidence based principles was confirmed for all participants, except for the two  
15 participants who withdrew following their initial assessment.

16  
17 Blinded re-assessment data were available for 45 participants, with 3 participants  
18 (usual care group) withdrawing from the trial and declining final assessment for  
19 similar reasons: "treatment has not helped me", "treatment has not done anything to  
20 help my leg pain at all", and "treatment has been a waste of time". As such, the last  
21 data point for each was carried forward for all outcomes except satisfaction, for  
22 which an initial data point was not available. Success rates for assessor blinding was  
23 91%, while 44% of participants correctly answered the blinding question regarding  
24 their therapists' cultural responsiveness. No participant experienced an adverse  
25 event due to participation in the trial.

1  
2  
3 1  
4  
5 2 Demographic and baseline symptom characteristics of participants are displayed in  
6  
7 3 Table 1. There were no significant differences between the groups for baseline  
8  
9 4 characteristics.

10  
11 5  
12  
13 6 *Primary outcomes*

14  
15 7 *Attendance*

16  
17  
18 8 Overall mean ( $\pm$ SD) attendance at physiotherapy was 8.0  $\pm$ 3.1 visits. The culturally  
19  
20 9 adapted treatment group attended a higher number of scheduled sessions compared  
21  
22 10 to 'usual physiotherapy care' (mean difference = 4.0 sessions, 95%CI 2.6 to 5.3).

23  
24  
25 11 There was an 87% ( $\pm$ 18) attendance rate in the culturally adapted program,  
26  
27 12 compared to 68% ( $\pm$ 32) in the usual care group with a medium between group effect  
28  
29 13 size ( $U=170$ ,  $r=0.36$ ).

30  
31  
32 14  
33  
34  
35 15 *Home Exercise Adherence*

36  
37  
38 16 Home exercise adherence data was available for all participants in the culturally  
39  
40 17 adapted program ( $n=24$ ) and 22 participants from the usual care group. Data were  
41  
42 18 absent for 2 participants who dropped out after their initial visit. Overall, adherence  
43  
44 19 varied from 0% to 100%. The average number of home exercises prescribed was  
45  
46 20 similar for the culturally adapted ( $n=7$ , range 2-10) and usual care group ( $n=6$ , range  
47  
48 21 3-11). Overall, the culturally adapted group had a higher adherence rate (88%  $\pm$ 15)  
49  
50 22 relative to usual physiotherapy care (55%  $\pm$ 43), consistent with a moderate between  
51  
52 23 group effect size ( $U=145$ ,  $r=0.39$ ).

53  
54  
55 24  
56  
57  
58  
59  
60

## 1 *Satisfaction*

2 Satisfaction data were available for all participants who attended the 3-month blinded  
3 assessment ( $n=45$ ). Overall, 93% of participants were satisfied with treatment, and  
4 71% were highly satisfied, evaluated by a score of greater than 50% and 75%,  
5 respectively for the CSQ-8. Satisfaction between the two groups did not differ. Mean  
6 CSQ-8 scores for the culturally adapted and usual physiotherapy care groups were  
7 82.7 ( $\pm 13.4$ ) and 79.3 ( $\pm 17.3$ ).

## 8 9 *Secondary Outcomes*

10 Culturally adapted treatment resulted in greater improvements in pain related  
11 suffering than 'usual physiotherapy care', with a medium effect size observed (partial  
12  $\eta^2$  0.086) (Table 2). A small effect size was observed for between group difference in  
13 favour of the culturally adapted group for BPI pain interference (partial  $\eta^2$  0.02) and  
14 6MWT (partial  $\eta^2$  0.053), while no effect was observed for BPI pain severity, STS  
15 test or the DASS-21 (Table 2).

## 16 17 *Sample size estimates*

18 With respect to feasibility for a larger trial based on trial data, for power of 80%,  
19 alpha of 5%, and a drop-out rate of 20%, a sample size of 124 in each group would  
20 be required to detect a clinically significant difference of 50m for walking distance<sup>42</sup>  
21 for the intervention group, based on the SD observed in our study of 128m. This  
22 sample size would also be sufficient to identify between-group differences for the BPI  
23 Severity (2.2-point difference, SD 2.51) and Interference subscales (2.2-point  
24 difference, SD 2.55), the PRISM suffering score (3.3 cm difference, SD 8.46) and the  
25 DASS total score (13-point difference, SD 31.88). A sample size of 300 would also

1  
2  
3 1 allow for clinically important between-group differences to be detected for the 1-  
4  
5 2 minute STS test (3 repetition difference, SD 8.46).  
6  
7 3

#### 4 **Discussion**

5  
6 The culturally adapted program was designed to target specific language, cultural,  
7 and access barriers faced by CALD communities that participate in pain  
8 management treatments. Results from this pilot study suggest there is an advantage  
9 in favour of a culturally adapted physiotherapy program relative to usual  
10 physiotherapy care for addressing barriers to optimal patient engagement. The  
11 culturally adapted programs were well-received by all 3 communities, demonstrated  
12 by significantly higher patient engagement (attendance, completion of treatment, and  
13 adherence) compared to the usual care group. While specific conclusions regarding  
14 the efficacy of treatment for clinical outcomes cannot be made, the moderate to  
15 small effect sizes observed for the secondary outcomes of pain-related suffering,  
16 pain interference and physical function warrant further investigation. Recent  
17 systematic reviews of multidisciplinary and exercise-based treatments for chronic  
18 pain have revealed pooled effect sizes that are small for function and disability, while  
19 pain and psychological health were associated with small effect sizes or no effect,  
20 depending on whether care was inter- or single-disciplinary.<sup>43-45</sup> In the context of  
21 such evidence, the results of this trial support further research into cultural  
22 adaptation to maximise the effect on pain and psychological outcomes.  
23

24 Attendance and treatment retention is an important aspect of patient engagement  
25 essential to ensure positive outcomes from cognitive behavioural and exercise

1 treatments for chronic pain are realised.<sup>16 17</sup> Despite this, drop-out from pain  
2 management programs has been reported to be as high as 40%<sup>46</sup>, while for  
3 exercise-based physiotherapy, drop-out rates of 30-40% are common.<sup>47 48</sup> In the  
4 current study, drop-out rates in the 'usual physiotherapy care' group (42%) were  
5 consistent with rates observed in the literature<sup>18 47 48</sup>, while for the 'culturally adapted'  
6 group, drop-out was less (4%). Further, attendance at scheduled sessions was  
7 higher in the 'culturally adapted' group, and participants were willing to attend for a  
8 greater number of sessions. In combination, such findings suggest that attention to  
9 social and ethnocultural dimensions unique to CALD migrant communities  
10 successfully engaged participants. For the culturally adapted group, a combination of  
11 both surface- (language, food, music, group interaction and setting) and deep-level  
12 (reframing content to align with explanatory models of pain and ethnocultural values)  
13 adaptations were included to enhance the cultural relevance of program content and  
14 facilitate patient engagement.<sup>25</sup> While programs were conducted in a similar  
15 geographic location (i.e. suburb) to the usual care group in the hospital outpatient  
16 service, the use of a community venue was an important technique for balancing  
17 power differentials in therapeutic relationships and reducing access barriers, thereby  
18 contributing to engagement outcomes.<sup>49 50</sup> As such broad multidimensional  
19 adaptations should be considered in future research.

20  
21 Treatment adherence is an aspect of patient engagement that has been positively  
22 related to patient outcomes in rehabilitation programs.<sup>17</sup> Nevertheless, adherence to  
23 exercise interventions for chronic pain conditions is suboptimal.<sup>51</sup> For example,  
24 adherence rates for osteoarthritis exercise programs can be as low as 50%<sup>52</sup>, and  
25 varies between 64% and 71% respectively, for neck pain and low back pain.<sup>51 53</sup> For



1  
2  
3 1 the current study, there was wide variation in adherence rates for the 'usual care'  
4  
5 2 group with a mean of 55% ( $\pm 43$ ), while for the 'culturally adapted' group, adherence  
6  
7 3 was significantly higher and less variable (88%  $\pm 15$ ). Low adherence rates in the  
8  
9 4 'usual care' group could have been due to suboptimal communication, patient-  
10  
11 5 provider interactions, and failure to adequately tailor interventions to the sociocultural  
12  
13 6 needs of the individual patient.<sup>54</sup> Further, a systematic review<sup>28</sup> cited the association  
14  
15 7 between anxiety and depression, highly prominent symptoms in our sample, with  
16  
17 8 reduced adherence to physiotherapy. However, since both treatment arms  
18  
19 9 experienced similar symptoms, this association alone, does not account for the  
20  
21 10 different adherence rates observed. Similarly, the low adherence rate for the 'usual  
22  
23 11 care' group could not be ascribed to language barriers, since both groups had similar  
24  
25 12 access to professional interpreting services and translated exercise diaries. Instead,  
26  
27 13 the current findings emphasise a potential role for physiotherapists to optimise the  
28  
29 14 inter-cultural therapeutic interaction by attending to a patient's beliefs and values,  
30  
31 15 and aligning treatment components accordingly.  
32  
33  
34  
35  
36

37 17 Baseline outcome data from the three CALD communities highlighted participants'  
38  
39 18 severe pain and psychological symptoms. Participants had higher mean pain  
40  
41 19 duration, and average pain severity scores, than those observed in cohorts attending  
42  
43 20 multidisciplinary pain clinics.<sup>55</sup> Similarly, average scores for depression, anxiety, and  
44  
45 21 stress according to the DASS, were all in the 'severe' range, and higher than mean  
46  
47 22 scores observed in a large Australian pain clinic cohort.<sup>55</sup> Potentially, such  
48  
49 23 observations were not surprising given 71% of our sample identified as refugees.  
50  
51 24 However, in the context of severe depression, the efficacy of rehabilitation programs  
52  
53 25 for chronic pain programs is known to be reduced.<sup>56</sup> As such, the physiotherapy  
54  
55  
56  
57  
58  
59  
60

1 approaches employed in our study might be insufficient to induce meaningful  
2 changes in pain and psychosocial functioning. While the individualised design of  
3 both treatment arms allowed for the involvement of other specialities, such as  
4 psychology, participants did not pursue this recommendation in 85% of cases. Such  
5 low uptake, in combination with high pain and psychological symptom scores,  
6 emphasises a need for treatment adaptations to engage other disciplines and align  
7 comprehensive multidisciplinary approaches with the beliefs, values, and unique  
8 needs of diverse ethnocultural communities. However, the maintained high  
9 adherence and attendance data for the culturally adapted group in the presence of  
10 high pain scores and psychological symptoms was a positive finding.

### 12 *Feasibility*

13 Previous research involving CALD communities has identified significant challenges  
14 in engagement and retention in clinical research.<sup>57</sup> Williams et al<sup>58</sup> enrolled and  
15 randomised 78 participants from 3 CALD backgrounds (Greek, Italian, and  
16 Vietnamese) living with chronic disease to a medication self-management program  
17 and found less than half completed the post-treatment reassessment (3-months).  
18 Similarly, Swerissen et al<sup>59</sup> found a 35% drop-out rate among CALD communities in  
19 Australia enrolled to a chronic disease self-management program. Despite this, our  
20 experience supports research inclusive of, and specifically targeted towards, CALD  
21 communities. Our high recruitment rates, short recruitment time, absence of adverse  
22 outcomes, and low trial drop-out rate of 6%, supports the feasibility of implementing  
23 randomised controlled research trial designs within CALD communities. Specific  
24 attention should be given towards involvement of bilingual support workers,  
25 professional translation and interpreting services, and engagement of ethnocultural

1  
2  
3 1 community members in trial design and implementation, to optimise the prospects of  
4  
5 2 the success of our pilot study.<sup>10</sup> Further, while cost-effectiveness was not a specific  
6  
7 3 outcome, there were no substantial cost disadvantages of delivering culturally  
8  
9 4 adapted treatment. Both treatment arms were delivered by public health outpatient  
10  
11 5 services. While the cost of hire of community venues was greater (\$1595 AUD), this  
12  
13 6 cost was offset by delivering 67% of culturally adapted treatment in groups. Similarly,  
14  
15 7 there were no cost disadvantages of engaging a bilingual support worker in lieu of a  
16  
17 8 health language interpreter, both of which are funded by different sectors of the  
18  
19 9 public health service. This provides further support for feasibility. Finally, sample size  
20  
21 10 estimates using our pilot data inform the feasibility of a fully powered RCT to  
22  
23 11 evaluate the clinical effectiveness of culturally adapted approaches, with the  
24  
25 12 potential to maintain participant engagement.  
26  
27  
28  
29  
30

### 31 14 *Study Limitations*

32  
33 15 While the 'culturally adapted' program was successfully piloted across the 3  
34  
35 16 ethnocultural communities, it is important to note the study's limitations. First,  
36  
37 17 participant adherence data relied on self-report. A log book was developed to  
38  
39 18 facilitate recording of adherence, but many participants (15/48) had difficulty  
40  
41 19 completing and/or did not complete the log-book. As such self-report during sessions  
42  
43 20 was used, and therefore data could have been compromised by recall error, or  
44  
45 21 desire to please the treatment provider.<sup>60</sup> This is a challenge for researchers working  
46  
47 22 with CALD communities who have linguistic limitations, with a need for reliable, valid  
48  
49 23 measures for recording patient adherence to address such issues. Second, some  
50  
51 24 participants with low education and literacy levels (33% of the sample had either no  
52  
53 25 or primary level schooling) were challenged by the log book and scale outcome  
54  
55  
56  
57  
58  
59  
60

1  
2  
3 1 measures, potentially compromising results. However, the challenge of literacy was  
4  
5 2 similar for both groups and is unlikely to explain any between-group differences  
6  
7 3 because all participants were provided with assistance from the bilingual blinded  
8  
9 4 assessor to interpret and complete outcome measures. Third, 44% of participants  
10  
11 5 were potentially unblinded, based on their responses to the participant blinding  
12  
13 6 question. However, since the difference between the two treatment arms ('culturally  
14  
15 7 adapted' versus 'usual physiotherapy') and study hypothesis was not disclosed to  
16  
17 8 participants, it is unlikely that this substantially influenced their treatment outcomes.  
18  
19 9 Fourth, since there was no follow-up beyond treatment conclusion, we cannot report  
20  
21 10 the sustainability of treatment gains. Thus, there is a need for longer-term outcomes.  
22  
23 11 Finally, current results only relate to the 3 ethnocultural communities of interest and  
24  
25 12 are not generalizable to broader CALD communities within Australia or  
26  
27 13 internationally. Nonetheless, improved engagement by all 3 communities highlights  
28  
29 14 that treatment approaches can be effectively adapted to suit individual communities,  
30  
31 15 using a structured adaptation framework.<sup>25</sup>  
32  
33  
34  
35  
36

37 17 A final consideration is the healthcare context within which this study was conducted.  
38  
39 18 Australia is a multicultural society and healthcare providers, including participating  
40  
41 19 physiotherapists, comprise a multitude of ethnocultural, religious and professional  
42  
43 20 identities, that influence their provision of healthcare and the inter-cultural  
44  
45 21 relationship.<sup>61 62</sup> As such, cultural concordance and healthcare provider cultural  
46  
47 22 responsiveness are factors that may have influenced treatment outcomes.<sup>63</sup> Future  
48  
49 23 studies may wish to consider the assessment of healthcare provider cultural  
50  
51 24 competence to allow treatment effects to be delineated between adaption elements  
52  
53 25 and therapist characteristics. Culture is a highly complex construct and it must be  
54  
55  
56  
57  
58  
59  
60

1  
2  
3  
4  
5  
6  
7  
8  
9  
10  
11  
12  
13  
14  
15  
16  
17  
18  
19  
20  
21  
22  
23  
24  
25  
26  
27  
28  
29  
30  
31  
32  
33  
34  
35  
36  
37  
38  
39  
40  
41  
42  
43  
44  
45  
46  
47  
48  
49  
50  
51  
52  
53  
54  
55  
56  
57  
58  
59  
60

1 considered that the culture of healthcare providers, along with the health system  
2 itself, will influence treatment outcomes.<sup>64</sup>

### 5 **Conclusions**

6 To meet the needs of multicultural populations, interventions should be tailored to  
7 the individual, social, and ethnocultural factors that influence health. Novel  
8 interventions, such as the culturally adapted physiotherapy approaches documented  
9 in this study, are likely to be critical for the development of effective pain  
10 management approaches that fully engage CALD patients with chronic pain.

## 1 **Acknowledgments**

2 The authors would like to acknowledge the bilingual community educators and  
3 volunteers who supported the design and implementation of this trial. Special thanks  
4 to the physiotherapy and administrative staff who assisted with aspects of trial  
5 implantation and delivery of interventions.

## 7 **Author contribution**

8 All authors have made a substantial contribution to this work. Conception, design,  
9 analysis and interpretation of data were completed by BB under the supervision of  
10 IV, SS and LC. All authors were involved in interpretation of the data, writing and  
11 editing of the manuscript. All authors have read and approved the final manuscript.

## 13 **Data Sharing**

14 Data are available by contacting the corresponding author at

15 [Bernadette.brady@health.nsw.gov.au](mailto:Bernadette.brady@health.nsw.gov.au).

16

1  
2  
3 **1 References**  
4  
5  
6

- 7 3 1. Chen J, Mullins CD, Novak P, et al. Personalized Strategies to Activate and  
8 4 Empower Patients in Health Care and Reduce Health Disparities. *Health Educ*  
9 5 *Behav.* 2016;43:25-34.  
10 6  
11 6 2. Barello S, Graffigna G, Vegni E. Patient Engagement as an Emerging Challenge  
12 7 for Healthcare Services: Mapping the Literature. *Nursing Research and Practice.*  
13 8 2012;1-7.  
14 9 3. Khoo S-E. Ethnic disparities in social and economic well-being of the immigrant  
15 10 aged in Australia. *Journal of Population Research.* 2012;29:119-140.  
16 11 4. Henderson S, Kendall E, See L. The effectiveness of culturally appropriate  
17 12 interventions to manage or prevent chronic disease in culturally and linguistically  
18 13 diverse communities: a systematic literature review. *Health Soc Care Community.*  
19 14 2011;19:225-249.  
20 15 5. Griner D, Smith TB. Culturally adapted mental health intervention: A meta-analytic  
21 16 review. *Psychotherapy.* 2006;43:531-548.  
22 17 6. Chowdhary N, Jotheeswaran AT, Nadkarni A, et al. The methods and outcomes of  
23 18 cultural adaptations of psychological treatments for depressive disorders: a  
24 19 systematic review. *Psychol Med.* 2014;44:1131-1146.  
25 20 7. Nierkens V, Hartman MA, Nicolaou M, et al. Effectiveness of Cultural Adaptations  
26 21 of Interventions Aimed at Smoking Cessation, Diet, and/or Physical Activity in Ethnic  
27 22 Minorities. A Systematic Review. *PLoS ONE.* 2013;8:e73373.  
28 23 8. Guadagnolo BA, Petereit DG, Coleman CN. Cancer Care Access and Outcomes  
29 24 for American Indian Populations in the United States: Challenges and Models for  
30 25 Progress. *Semin Radiat Oncol.* 2017; 27:143-149.  
31  
32  
33  
34  
35  
36  
37  
38  
39  
40  
41  
42  
43  
44  
45  
46  
47  
48  
49  
50  
51  
52  
53  
54  
55  
56  
57  
58  
59  
60

- 1  
2  
3 1 9. Harper Shehadeh M, Heim E, Chowdhary N, et al. Cultural Adaptation of  
4  
5 2 Minimally Guided Interventions for Common Mental Disorders: A Systematic Review  
6  
7 3 and Meta-Analysis. *JMIR Mental Health*. 2016;3:e44.  
8  
9 4 10. Brady B, Veljanova I, Chipchase L. Are multidisciplinary interventions  
10  
11 5 multicultural? A topical review of the pain literature as it relates to culturally diverse  
12  
13 6 patient groups. *Pain*. 2016;157:321-328.  
14  
15 7 11. Vos T, Flaxman AD, Naghavi M, et al. Years lived with disability (YLDs) for 1160  
16  
17 8 sequelae of 289 diseases and injuries 1990-2010: a systematic analysis for the  
18  
19 9 Global Burden of Disease Study 2010. *Lancet*. 2012;380:2163-2196.  
20  
21 10 12. Hall A, Richmond H, Copsey B, et al. Physiotherapist-delivered cognitive-  
22  
23 11 behavioural interventions are effective for low back pain, but can they be replicated  
24  
25 12 in clinical practice? A systematic review. *Disabil Rehabil*. 2016:1-9.  
26  
27 13 13. Kaapa EH, Frantsi K, Sarna S, et al. Multidisciplinary group rehabilitation versus  
28  
29 14 individual physiotherapy for chronic nonspecific low back pain: a randomized trial.  
30  
31 15 *Spine*. 2006;31:371-6.  
32  
33 16 14. Sullivan MJL, Adams H. Psychosocial Treatment Techniques to Augment the  
34  
35 17 Impact of Physiotherapy Interventions for Low Back Pain. *Physiother Can*.  
36  
37 18 2010;62:180-189.  
38  
39 19 15. Brady B, Veljanova I, Chipchase L. An exploration of the experience of pain  
40  
41 20 among culturally diverse migrant communities. *Rheumatology Advances in Practice*.  
42  
43 21 2017;1:rkx002.  
44  
45 22 16. Hall AM, Ferreira PH, Maher CG, et al. The Influence of the Therapist-Patient  
46  
47 23 Relationship on Treatment Outcome in Physical Rehabilitation: A Systematic  
48  
49 24 Review. *Phys Ther*. 2010; 90:1099-110.  
50  
51  
52  
53  
54  
55  
56  
57  
58  
59  
60



- 1  
2  
3 1 17. Nicholas MK, Asghari A, Corbett M, et al. Is adherence to pain self-management  
4  
5 2 strategies associated with improved pain, depression and disability in those with  
6  
7 3 disabling chronic pain? *Eur J Pain*. 2012;16:93-104.  
8  
9 4 18. Sloots M, Scheppers EF, van de Weg FB, et al. Higher dropout rate in non-native  
10  
11 5 patients than in native patients in rehabilitation in The Netherlands. *Int J Rehabil*  
12  
13 6 *Res*. 2009;32:232-237.  
14  
15 7 19. Mir G, Sheikh A. 'Fasting and prayer don't concern the doctors ... they don't even  
16  
17 8 know what it is': communication, decision-making and perceived social relations of  
18  
19 9 Pakistani Muslim patients with long-term illnesses. *Ethn Health*. 2010;15:327-342.  
20  
21 10 20. Sloots M, Dekker JH, Pont M, et al. Reasons of drop-out from rehabilitation in  
22  
23 11 patients of Turkish and Moroccan origin with chronic low back pain in The  
24  
25 12 Netherlands: a qualitative study. *J Rehabil Med*. 2010;42:566-573.  
26  
27 13 21. Drwecki BB, Moore CF, Ward SE, et al. Reducing racial disparities in pain  
28  
29 14 treatment: The role of empathy and perspective-taking. *Pain*. 2011;152:1001-06.  
30  
31 15 22. Hall WJ, Chapman MV, Lee KM, et al. Implicit Racial/Ethnic Bias Among Health  
32  
33 16 Care Professionals and Its Influence on Health Care Outcomes: A Systematic  
34  
35 17 Review. *Am J Public Health*. 2015;105:e60-76.  
36  
37 18 23. Shen MJ, Peterson EB, Costas-Muñiz R, et al. The Effects of Race and Racial  
38  
39 19 Concordance on Patient-Physician Communication: A Systematic Review of the  
40  
41 20 Literature. *J Racial Ethn Health Disparities*. 2018;5:117-40.  
42  
43 21 24. Doyle C, Lennox L, Bell D. A systematic review of evidence on the links between  
44  
45 22 patient experience and clinical safety and effectiveness. *BMJ Open*. 2013;3:e001570  
46  
47 23 25. Brady B, Veljanova I, Schabrun S, et al. Integrating culturally informed  
48  
49 24 approaches into the physiotherapy assessment and treatment of chronic pain:  
50  
51 25 protocol for a pilot randomised controlled trial. *BMJ Open*. 2017;7:e 014449  
52  
53  
54  
55  
56  
57  
58  
59  
60

- 1  
2  
3 1 26. Cheng L, Leon V, Liang A, et al. Patient-centered care in physical therapy:  
4  
5 2 definition, operationalization, and outcome measures. *Physical Therapy Reviews*.  
6  
7 3 2016;21:109-23.  
8  
9 4 27. Critchley DJ, Ratcliffe J, Noonan S, et al. Effectiveness and cost-effectiveness of  
10  
11 5 three types of physiotherapy used to reduce chronic low back pain disability: a  
12  
13 6 pragmatic randomized trial with economic evaluation. *Spine*. 2007;32:1474-1481.  
14  
15 7 28. Jack K, McLean SM, Moffett JK, et al. Barriers to treatment adherence in  
16  
17 8 physiotherapy outpatient clinics: A systematic review. *Man Ther*. 2010;15:220-228.  
18  
19 9 29. Attkisson CC, Zwick R. The client satisfaction questionnaire. Psychometric  
20  
21 10 properties and correlations with service utilization and psychotherapy outcome. *Eval*  
22  
23 11 *Program Plann*. 1982;5:233-237.  
24  
25 12 30. Dworkin R, Turk DC, Farrar J, et al. Core outcome measures for chronic pain  
26  
27 13 clinical trials: IMMPACT recommendations. *Pain*. 2005;113:9-19.  
28  
29 31. Keller S, Bann CM, Dodd SL, et al. Validity of the brief pain inventory for use in  
30  
31 14 documenting the outcomes of patients with noncancer pain. *Clin J Pain*.  
32  
33 15 2004;20:309-318.  
34  
35 16 32. Kassardjian CD, Gardner-Nix J, Dupak K, et al. Validating PRISM (Pictorial  
36  
37 17 Representation of Illness and Self Measure) as a measure of suffering in chronic  
38  
39 18 non-cancer pain patients. *J Pain*. 2008;9:1135-1143.  
40  
41 19 33. Harding V, De C Williams AC, Richardson P, et al. The development of a battery  
42  
43 20 of measures for assessing physical functioning of chronic pain patients. *Pain*.  
44  
45 21 1994;58:367-375.  
46  
47 22 34. Peppin JF, Marcum S, Kirsh KL. The chronic pain patient and functional  
48  
49 23 assessment: use of the 6-Minute Walk Test in a multidisciplinary pain clinic. *Curr*  
50  
51 24 *Med Res Opin*. 2014;30:361-365.  
52  
53  
54  
55  
56  
57  
58  
59  
60

- 1  
2  
3 1 35. Lovibond SH, Lovibond PF. *Manual for the Depression Anxiety Stress Scales*.  
4  
5 2 2nd ed. Sydney: Psychology Foundation; 1995.  
6  
7 3 36. Hertzog MA. Considerations in determining sample size for pilot studies. *Res*  
8  
9 4 *Nurs Health* 2008;31:180-91.  
10  
11 5 37. Whitehead AL, Julious SA, Cooper CL, et al. Estimating the sample size for a  
12  
13 6 pilot randomised trial to minimise the overall trial sample size for the external pilot  
14  
15 7 and main trial for a continuous outcome variable. *Stat Methods Med Res*.  
16  
17 8 2016;25:1057-73.  
18  
19 9 38. Fritz CO, Morris PE, Richler JJ. Effect size estimates: current use, calculations,  
20  
21 10 and interpretation. *J Exp Psychol*. 2012;141:2-18.  
22  
23 11 39. Richardson J. Eta squared and partial eta squared as measures of effect size in  
24  
25 12 educational research. *Educational Research Review*. 2011;6:135-147.  
26  
27 13 40. Templeton G. A Two-Step Approach for Transforming Continuous Variables to  
28  
29 14 Normal: Implications and Recommendations for IS Research. *Communications of the*  
30  
31 15 *Association for Information Systems*. 2011;28:41-58.  
32  
33 16 41. Streiner D, Geddes J. Intention to treat analysis in clinical trials when there are  
34  
35 17 missing data. *Evidence Based Mental Health*. 2001;4:70.  
36  
37 18 42. Perera S, Mody SH, Woodman RC, et al. Meaningful change and  
38  
39 19 responsiveness in common physical performance measures in older adults. *J Am*  
40  
41 20 *Geriatr Soc*. 2006;54:743-749.  
42  
43 21 43. van Middelkoop M, Rubinstein SM, Kuijpers T, et al. A systematic review on the  
44  
45 22 effectiveness of physical and rehabilitation interventions for chronic non-specific low  
46  
47 23 back pain. *Eur Spine J*. 2011;20:19-39.  
48  
49  
50  
51  
52  
53  
54  
55  
56  
57  
58  
59  
60

- 1  
2  
3 1 44. Kamper SJ, Apeldoorn AT, Chiarotto A, et al. Multidisciplinary biopsychosocial  
4  
5 2 rehabilitation for chronic low back pain: Cochrane systematic review and meta-  
6  
7 3 analysis. *BMJ*. 2015;350:h444.  
8  
9 4 45. Geneen LJ, Moore RA, Clarke C, et al. Physical activity and exercise for chronic  
10  
11 5 pain in adults: an overview of Cochrane Reviews. *Cochrane Database Syst Rev*.  
12  
13 6 2017;4:CD011279.  
14  
15 7 46. Martin J, Torre F, Aguirre U, et al. Evaluation of the interdisciplinary PSYMEPHY  
16  
17 8 treatment on patients with fibromyalgia: a randomized control trial. *Pain Med*.  
18  
19 9 2014;15:682-691.  
20  
21 10 47. Long A, Donelson R, Fung T. Does it matter which exercise? A randomized  
22  
23 11 control trial of exercise for low back pain. *Spine*. 2004;29:2593-2602.  
24  
25 12 48. Rooks DS, Gautam S, Romeling M, et al. Group exercise, education, and  
26  
27 13 combination self-management in women with fibromyalgia: A randomized trial. *Arch*  
28  
29 14 *Intern Med*. 2007;167:2192-2200.  
30  
31 15 49. Scheppers E, van Dongen E, Dekker J, et al. Potential barriers to the use of  
32  
33 16 health services among ethnic minorities: a review. *Fam Prac*. 2006;23:325-48.  
34  
35 17 50. Degrie L, Gastmans C, Mahieu L, et al. How do ethnic minority patients  
36  
37 18 experience the intercultural care encounter in hospitals? A systematic review of  
38  
39 19 qualitative research. *BMC Med Ethics*. 2017;18:2.  
40  
41 20 51. McLean SM, Klaber Moffett JA, Sharp DM, et al. A randomised controlled trial  
42  
43 21 comparing graded exercise treatment and usual physiotherapy for patients with non-  
44  
45 22 specific neck pain (the GET UP neck pain trial). *Man Ther*. 2013;18:199-205.  
46  
47 23 52. Carr A. Barriers to the effectiveness of any intervention in OA. *Bes Pract Res*  
48  
49 24 *Clin Rheumatol*. 2001;15:645-656.  
50  
51  
52  
53  
54  
55  
56  
57  
58  
59  
60

- 1  
2  
3 1 53. Kolt GS, McEvoy JF. Adherence to rehabilitation in patients with low back pain.  
4  
5 2 *Man Ther.* 2003;8:110-116.  
6  
7 3 54. Butow P, Sharpe L. The impact of communication on adherence in pain  
8  
9 4 management. *Pain.* 2013;154:S101-S107.  
10  
11 5 55. Nicholas MK, Asghari A, Blyth FM. What do the numbers mean? Normative data  
12  
13 6 in chronic pain measures. *Pain.* 2008;134:158-173.  
14  
15 7 56. Bair MJ, Robinson RL, Katon W, et al. Depression and pain comorbidity: A  
16  
17 8 literature review. *Arch Intern Med.* 2003;163:2433-2445.  
18  
19 9 57. Gayet-Ageron A, Agoritsas T, Schiesari L, et al. Barriers to participation in a  
20  
21 10 patient satisfaction survey: who are we missing? *PLoS One.* 2011;6:e26852.  
22  
23 11 58. Williams A, Manias E, Liew D, et al. Working with CALD groups: testing the  
24  
25 12 feasibility of an intervention to improve medication self-management in people with  
26  
27 13 kidney disease, diabetes, and cardiovascular disease. *Ren Soc Australas J.*  
28  
29 14 2012;8:62-69.  
30  
31 15 59. Swerissen H, Belfrage J, Weeks A, et al. A randomised control trial of a self-  
32  
33 16 management program for people with a chronic illness from Vietnamese, Chinese,  
34  
35 17 Italian and Greek backgrounds. *Patient Educ Couns.* 2006;64:360-368.  
36  
37 18 60. Bollen JC, Dean SG, Siegert RJ, et al. A systematic review of measures of self-  
38  
39 19 reported adherence to unsupervised home-based rehabilitation exercise  
40  
41 20 programmes, and their psychometric properties. *BMJ Open.* 2014;4:e005044.  
42  
43 21 61. Brady B, Veljanova I, Chipchase L. Culturally informed practice and  
44  
45 22 physiotherapy. *J Physiother.* 2016;62:121-23.  
46  
47 23 62. Aguilar A, Stupans I, Scutter S, et al. Exploring the Professional Values of  
48  
49 24 Australian Physiotherapists. *Physiother Res Int.* 2013;18:27-36.  
50  
51  
52  
53  
54  
55  
56  
57  
58  
59  
60

1  
2  
3 1 63. Horvat L, Horey D, Romios P, et al. Cultural competence education for health  
4  
5 2 professionals. *Cochrane Database Syst Rev*. 2014;5:Cd009405.

6  
7 3 64. Betancourt JR, Green AR, Carrillo JE, et al. Cultural Competence And Health  
8  
9 4 Care Disparities: Key Perspectives And Trends. *Health Aff*. 2005;24:499-505.

10  
11 5  
12  
13  
14  
15  
16  
17  
18  
19  
20  
21  
22  
23  
24  
25  
26  
27  
28  
29  
30  
31  
32  
33  
34  
35  
36  
37  
38  
39  
40  
41  
42  
43  
44  
45  
46  
47  
48  
49  
50  
51  
52  
53  
54  
55  
56  
57  
58  
59  
60

For peer review only

1  
2  
3  
4  
5  
6  
7  
8  
9  
10  
11  
12  
13  
14  
15  
16  
17  
18  
19  
20  
21  
22  
23  
24  
25  
26  
27  
28  
29  
30  
31  
32  
33  
34  
35  
36  
37  
38  
39  
40  
41  
42  
43  
44  
45  
46  
47  
48  
49  
50  
51  
52  
53  
54  
55  
56  
57  
58  
59  
60

- 1 Figure 1 Flow diagram of the study following Consolidated Standards of Reporting
- 2 Trial guidelines.
- 3

For peer review only

1 **Table 1 Participant Baseline Demographic and Symptom Characteristics**

|                                                       | <b>Culturally adapted</b> | <b>Usual Care</b> |
|-------------------------------------------------------|---------------------------|-------------------|
|                                                       | <b>(n = 24)</b>           | <b>(n = 24)</b>   |
| <b>Age (years)</b>                                    | 55 (10.0)                 | 54 (10.9)         |
| <b>Sex, (n) Male: Female</b>                          | 5:19                      | 4:20              |
| <b>Length of time in Australia, years</b>             | 15.5 (12.9)               | 14.0 (10.1)       |
| <b>Migration circumstances</b>                        |                           |                   |
| Voluntary migrant, n (%)                              | 6 (25%)                   | 8 (33%)           |
| Refugee, n (%)                                        | 18 (75%)                  | 16 (67%)          |
| <b>Marital status - Married n (%)</b>                 | 16 (67%)                  | 18 (75%)          |
| <b>Level of education</b>                             |                           |                   |
| No school or primary, n                               | 9 (38%)                   | 7 (29%)           |
| Secondary, n                                          | 13 (54%)                  | 13 (54%)          |
| Tertiary, n                                           | 2 (8%)                    | 4 (17%)           |
| <b>Duration of Pain (years)</b>                       | 10.0 (7.9)                | 8.5 (7.3)         |
| <b>Work status</b>                                    |                           |                   |
| Full or part-time work, n                             | 1 (4%)                    | 2 (8.3%)          |
| Unemployed due to pain, n                             | 18 (75%)                  | 18 (75%)          |
| Retired, n                                            | 2 (8%)                    | 2 (8.3%)          |
| Other, n                                              | 3 (13%)                   | 2 (8.3%)          |
| <b>Receiving pension or benefit, n (%)</b>            | 23 (96%)                  | 22 (92%)          |
| <b>Mean classes of pain medication<sup>#</sup> /5</b> | 2.08 (0.78)               | 2.08 (0.72)       |
| <b>BPI (Pain Severity) /10</b>                        | 7.3 (1.8)                 | 7.4 (1.3)         |
| <b>BPI (Pain Interference) /10</b>                    | 7.7 (1.6)                 | 7.1 (1.3)         |
| <b>DASS Sub-scores /42</b>                            |                           |                   |
| Depression                                            | 27.6 (12.2)               | 26.0 (9.8)        |
| Anxiety                                               | 23.9 (12.4)               | 23.5 (10.2)       |
| Stress                                                | 26.8 (11.4)               | 28.8 (8.3)        |
| <b>Pain Suffering (PRISM) /27</b>                     | 3.4 (5.0)                 | 5.2 (6.4)         |
| <b>6MWT</b>                                           | 266.8 (142.3)             | 265.3 (108.7)     |



|                       |           |           |
|-----------------------|-----------|-----------|
| <b>1 min STS test</b> | 9.6 (6.5) | 9.4 (6.9) |
|-----------------------|-----------|-----------|

1 Data are presented as mean ( $\pm$ SD) unless otherwise indicated

2 n = Number of participants                      % = Percentage within the group

3 BPI = Brief Pain Inventory                      DASS = Depression, Anxiety and Stress Scale

4 6MWT = Six-minute walk test                      1 min STS test = 1-minute sit to stand test

5 PRISM = Pictorial Representation of Illness and Self Measure Separation

6 #Classes included simple analgesics, compound analgesics, anti-inflammatory, anti-convulsant and  
7 opioids.

8

For peer review only

**Table 2 Between-group comparison**

|                        | ANOVA                                     |                |                  |
|------------------------|-------------------------------------------|----------------|------------------|
|                        | Time x Group                              |                |                  |
|                        | Between-group comparison of change scores | F (1,46) value | partial $\eta^2$ |
|                        | Culture – Usual                           |                |                  |
|                        | Mean (95% CI)                             |                |                  |
| BPI Pain Severity      | -0.14 (-1.25 to 0.97)^                    | 0.063          | 0.001            |
| BPI Pain Interference‡ | -0.57 (-1.73 to 0.60)^                    | 0.962          | 0.020            |
| Pain-Self Separation‡  | 3.56 (0.11 to 7.0)                        | 4.322          | 0.086            |
| 6MWT (m)               | 28.44 (-7.40 to 64.28)                    | 2.551          | 0.053            |
| STS test (reps)        | 1.13 (-2.44 to 4.69)                      | 0.405          | 0.009            |
| DASS Depression        | -2.67 (-9.03 to 3.69)^                    | 0.712          | 0.015            |
| DASS Anxiety           | -2.0 (-8.28 to 4.28)^                     | 0.411          | 0.009            |
| DASS Stress            | 0.58 (-4.80 to 5.97)^                     | 0.048          | 0.001            |

1  
2  
3  
4  
5  
6  
7  
8  
9  
10  
11  
12  
13  
14  
15  
16  
17  
18  
19  
20  
21  
22  
23  
24  
25  
26  
27  
28  
29  
30  
31  
32  
33  
34  
35  
36  
37  
38  
39  
40  
41  
42  
43  
44  
45  
46  
47

^Minus score in favour of experimental group

‡ Transformed data

BPI: Brief Pain Inventory

6MWT: Six-minute walk test

STS test: 1 minute sit to stand test reps: repetitions

DASS: Depression, Anxiety and Stress Scale

For peer review only

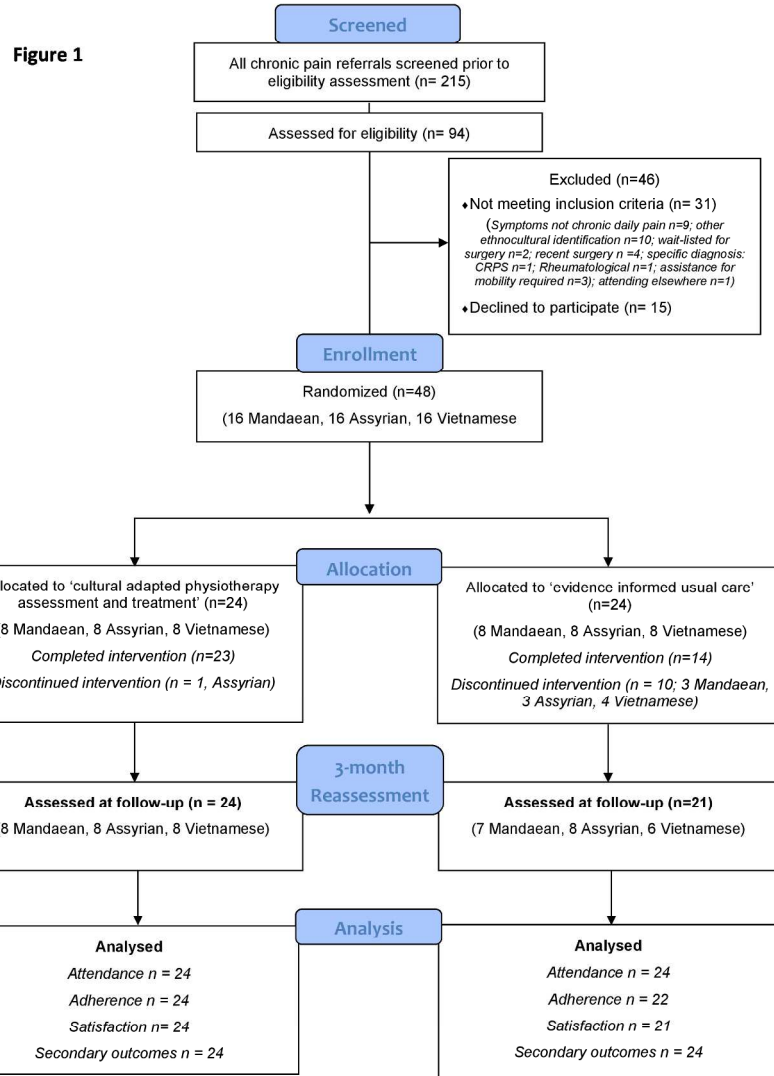

Figure 1 Flow diagram of the study following Consolidated Standards of Reporting Trial guidelines.

215x279mm (300 x 300 DPI)

1  
2  
3  
4  
5  
6  
7  
8  
9  
10  
11  
12  
13  
14  
15  
16  
17  
18  
19  
20  
21  
22  
23  
24  
25  
26  
27  
28  
29  
30  
31  
32  
33  
34  
35  
36  
37  
38  
39  
40  
41  
42  
43  
44  
45  
46

**Appendix One Examples of culturally adapted elements**

|                  | <b>Mandaean</b>                                                                                                                                                                                            | <b>Assyrian</b>                                                                                                                                                                                                                     | <b>Vietnamese</b>                                                                                                                                                                                                                                            |
|------------------|------------------------------------------------------------------------------------------------------------------------------------------------------------------------------------------------------------|-------------------------------------------------------------------------------------------------------------------------------------------------------------------------------------------------------------------------------------|--------------------------------------------------------------------------------------------------------------------------------------------------------------------------------------------------------------------------------------------------------------|
| <b>Language</b>  | Program content to be delivered in Iraqi Arabic and program materials translated into Arabic and reviewed by a Mandaean community member and health worker.                                                | Program content to be delivered in Assyrian language. Materials translated into Arabic (reflective of the reading/writing language of the Iraqi Assyrian community) and reviewed by an Assyrian community member and health worker. | Program content and materials to be delivered and translated into Vietnamese and reviewed by a Vietnamese community member and health worker.                                                                                                                |
| <b>Persons</b>   | Delivered by an Arabic multicultural health worker* and the physiotherapist who developed the culturally adapted approaches, with guest speakers from the Mandaean community.                              | Delivered by an Assyrian multicultural health worker* and the physiotherapist who developed the culturally adapted approaches with guest speakers from the Assyrian community.                                                      | Delivered by a Vietnamese multicultural health worker* and the physiotherapist who developed the culturally adapted approaches with input from the Vietnamese community in traditional health practices.                                                     |
| <b>Metaphors</b> | Water, an important ethnoreligious symbol for Mandaeans, utilised as a metaphor and tool in sessions for rejuvenation of the self and a means of connecting with spiritual supports.                       | The giving and sharing of food will be integrated into sessions as a metaphor and means for community connectedness and support.                                                                                                    | Traditional Vietnamese proverbs incorporated as “take home messages” for each session, providing a means for the sharing of advice in non-confrontational ways.                                                                                              |
| <b>Content</b>   | Culturally specific case examples will be used to communicate concepts such as pacing and graded exposure. Spiritual relaxation methods will be incorporated as part of physical and emotional pain coping | Culturally specific case examples will be used to communicate concepts of pacing and graded exposure. Traditional Assyrian dance will form the basis for exercise components.                                                       | Traditional medicine components will be incorporated into pain reliving strategies. Exercise, activity and pacing will be framed with an emphasis of Am-Duong Harmony. Exercises will be categorised for participants as either Am or Duong and participants |

|                 |                                                                                                                                                                                                                                                                                                                                                 |                                                                                                                                                                                                                                      |                                                                                                                                                                                                                                                      |
|-----------------|-------------------------------------------------------------------------------------------------------------------------------------------------------------------------------------------------------------------------------------------------------------------------------------------------------------------------------------------------|--------------------------------------------------------------------------------------------------------------------------------------------------------------------------------------------------------------------------------------|------------------------------------------------------------------------------------------------------------------------------------------------------------------------------------------------------------------------------------------------------|
|                 | strategies. Culturally specific music will be used to facilitate exercise sessions.                                                                                                                                                                                                                                                             |                                                                                                                                                                                                                                      | encouraged to focus on achieving balance/harmony with their programs.                                                                                                                                                                                |
| <b>Concepts</b> | Biopsychosocial-spiritual theoretical construct underpins the program content, as informed by focus group findings                                                                                                                                                                                                                              | Biomedical theoretic construct underpins the adaptation of the program content and its delivery to participants, according to the focus group findings.                                                                              | Traditional Am-Duong Medicine construct underpins the adaptation of the program content and its delivery to participants, according to the focus group findings.                                                                                     |
| <b>Goals</b>    | Focused on fulfilment of traditional cultural roles and expectations. For example, goals for women will focus around ability to fulfil the role of carer and adhere to the Mandaean customs (such as prayer and food preparation customs).                                                                                                      | Focused on fulfilment of traditional cultural roles and expectations. For example, goals for women will focus on ability to prepare and share traditional Assyrian food with family, relatives and friends.                          | Focused on fulfilment of traditional cultural roles and expectations. For example, goals for men will focus on setting an example for the children, building self-management strategies in order to avoid burdening the family or displaying pain.   |
| <b>Methods</b>  | Drawing on the strength of the three collectivist communities by encouraging group sharing, bringing family/friends along to the sessions and inviting community members to share their experiences and knowledge. The programs are designed to be delivered in a large community hall or group room that is located central to each community. |                                                                                                                                                                                                                                      |                                                                                                                                                                                                                                                      |
| <b>Context</b>  | Recognising the social, environmental, political and economic context this community experienced their pain as refugees. Links and references to community support structures such as migrant resource centres, community social programs and other health services.                                                                            | Recognising the social, environmental, political and economic context this community experienced their pain. Links and references the Assyrian Resource Centre, community social and religious activities and other health services. | Recognising the social, environmental, political and economic context this community experienced their pain. Links to community supports and facilitative programs such as meditation classes and public accessible exercise programs (eg. tai chi). |

Table reproduced with permission from Brady et al 2017<sup>22</sup>

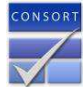

## CONSORT 2010 checklist of information to include when reporting a pilot or feasibility trial\*

| Section/Topic             | Item No | Checklist item                                                                                                                                               | Reported on page No                         |
|---------------------------|---------|--------------------------------------------------------------------------------------------------------------------------------------------------------------|---------------------------------------------|
| <b>Title and abstract</b> |         |                                                                                                                                                              |                                             |
|                           | 1a      | Identification as a pilot or feasibility randomised trial in the title                                                                                       | Page 2, lines 1-2                           |
|                           | 1b      | Structured summary of pilot trial design, methods, results, and conclusions (for specific guidance see CONSORT abstract extension for pilot trials)          | Page 2-3 and attached checklist             |
| <b>Introduction</b>       |         |                                                                                                                                                              |                                             |
| Background and objectives | 2a      | Scientific background and explanation of rationale for future definitive trial, and reasons for randomised pilot trial                                       | Pages 6-8                                   |
|                           | 2b      | Specific objectives or research questions for pilot trial                                                                                                    | Page 8, lines 1-10                          |
| <b>Methods</b>            |         |                                                                                                                                                              |                                             |
| Trial design              | 3a      | Description of pilot trial design (such as parallel, factorial) including allocation ratio                                                                   | Page 8, lines 14-17 and page 9, lines 12-14 |
|                           | 3b      | Important changes to methods after pilot trial commencement (such as eligibility criteria), with reasons                                                     | Page 14, lines 9-20                         |
| Participants              | 4a      | Eligibility criteria for participants                                                                                                                        | Page 9, lines 1-9                           |
|                           | 4b      | Settings and locations where the data were collected                                                                                                         | Page 8, lines 17-19                         |
|                           | 4c      | How participants were identified and consented                                                                                                               | Page 9, lines 2-9                           |
| Interventions             | 5       | The interventions for each group with sufficient details to allow replication, including how and when they were actually administered                        | Page 10-11                                  |
| Outcomes                  | 6a      | Completely defined prespecified assessments or measurements to address each pilot trial objective specified in 2b, including how and when they were assessed | Page 11, lines 17-23 and                    |

|                                                      |     |                                                                                                                                                                                             |                         |
|------------------------------------------------------|-----|---------------------------------------------------------------------------------------------------------------------------------------------------------------------------------------------|-------------------------|
|                                                      |     |                                                                                                                                                                                             | page 12.                |
|                                                      | 6b  | Any changes to pilot trial assessments or measurements after the pilot trial commenced, with reasons                                                                                        | N/A                     |
|                                                      | 6c  | If applicable, prespecified criteria used to judge whether, or how, to proceed with future definitive trial                                                                                 | Page 12, lines 1-13     |
| Sample size                                          | 7a  | Rationale for numbers in the pilot trial                                                                                                                                                    | Page 13, lines 10-15    |
|                                                      | 7b  | When applicable, explanation of any interim analyses and stopping guidelines                                                                                                                | N/A                     |
| Randomisation:                                       |     |                                                                                                                                                                                             |                         |
| Sequence generation                                  | 8a  | Method used to generate the random allocation sequence                                                                                                                                      | Page 9, lines 12-16     |
|                                                      | 8b  | Type of randomisation(s); details of any restriction (such as blocking and block size)                                                                                                      | Page 9, lines 13        |
| Allocation concealment mechanism                     | 9   | Mechanism used to implement the random allocation sequence (such as sequentially numbered containers), describing any steps taken to conceal the sequence until interventions were assigned | Page 9, line 15         |
| Implementation                                       | 10  | Who generated the random allocation sequence, who enrolled participants, and who assigned participants to interventions                                                                     | Page 9, lines 14-16     |
| Blinding                                             | 11a | If done, who was blinded after assignment to interventions (for example, participants, care providers, those assessing outcomes) and how                                                    | Page 9, lines 15-22     |
|                                                      | 11b | If relevant, description of the similarity of interventions                                                                                                                                 | N/A                     |
| Statistical methods                                  | 12  | Methods used to address each pilot trial objective whether qualitative or quantitative                                                                                                      | Page 13 and 14          |
| <b>Results</b>                                       |     |                                                                                                                                                                                             |                         |
| Participant flow (a diagram is strongly recommended) | 13a | For each group, the numbers of participants who were approached and/or assessed for eligibility, randomly assigned, received intended treatment, and were assessed for each objective       | Figure 1 and page 14-15 |
|                                                      | 13b | For each group, losses and exclusions after randomisation, together with reasons                                                                                                            | Page 15, lines 5-13     |
| Recruitment                                          | 14a | Dates defining the periods of recruitment and follow-up                                                                                                                                     | Page 14, lines 15-18    |
|                                                      | 14b | Why the pilot trial ended or was stopped                                                                                                                                                    | Page 14-15              |
| Baseline data                                        | 15  | A table showing baseline demographic and clinical characteristics for each group                                                                                                            | Table 1                 |
| Numbers analysed                                     | 16  | For each objective, number of participants (denominator) included in each analysis. If relevant, these numbers should be by randomised group                                                | Page 15-16 and Table 1, |



|                          |     |                                                                                                                                                                                |                                                                                         |
|--------------------------|-----|--------------------------------------------------------------------------------------------------------------------------------------------------------------------------------|-----------------------------------------------------------------------------------------|
|                          |     |                                                                                                                                                                                | Table 2                                                                                 |
| Outcomes and estimation  | 17  | For each objective, results including expressions of uncertainty (such as 95% confidence interval) for any estimates. If relevant, these results should be by randomised group | Table 2                                                                                 |
| Ancillary analyses       | 18  | Results of any other analyses performed that could be used to inform the future definitive trial                                                                               | Page 17, lines 4-14                                                                     |
| Harms                    | 19  | All important harms or unintended effects in each group (for specific guidance see CONSORT for harms)                                                                          | Page 15, line 12-13                                                                     |
|                          | 19a | If relevant, other important unintended consequences                                                                                                                           | n/a                                                                                     |
| <b>Discussion</b>        |     |                                                                                                                                                                                |                                                                                         |
| Limitations              | 20  | Pilot trial limitations, addressing sources of potential bias and remaining uncertainty about feasibility                                                                      | Page 21-22                                                                              |
| Generalisability         | 21  | Generalisability (applicability) of pilot trial methods and findings to future definitive trial and other studies                                                              | Page 20-21                                                                              |
| Interpretation           | 22  | Interpretation consistent with pilot trial objectives and findings, balancing potential benefits and harms, and considering other relevant evidence                            | Page 17-21                                                                              |
|                          | 22a | Implications for progression from pilot to future definitive trial, including any proposed amendments                                                                          | Page 20, lines 3-11<br>Page 21, lines 1-5<br>Page 21, lines 16-18<br>Page 22, lines 5-8 |
| <b>Other information</b> |     |                                                                                                                                                                                |                                                                                         |
| Registration             | 23  | Registration number for pilot trial and name of trial registry                                                                                                                 | Page 3, lines 17-18                                                                     |
| Protocol                 | 24  | Where the pilot trial protocol can be accessed, if available                                                                                                                   | Page 5, lines 5-9                                                                       |
| Funding                  | 25  | Sources of funding and other support (such as supply of drugs), role of funders                                                                                                | Page 4, lines 10-17                                                                     |
|                          | 26  | Ethical approval or approval by research review committee, confirmed with reference number                                                                                     | Page 5, lines 1-3                                                                       |

Citation: Eldridge SM, Chan CL, Campbell MJ, Bond CM, Hopewell S, Thabane L, et al. CONSORT 2010 statement: extension to randomised pilot and feasibility trials. BMJ. 2016;355.

1  
2 \*We strongly recommend reading this statement in conjunction with the CONSORT 2010, extension to randomised pilot and feasibility trials, Explanation and Elaboration for important  
3 clarifications on all the items. If relevant, we also recommend reading CONSORT extensions for cluster randomised trials, non-inferiority and equivalence trials, non-pharmacological  
4 treatments, herbal interventions, and pragmatic trials. Additional extensions are forthcoming: for those and for up to date references relevant to this checklist, see [www.consort-statement.org](http://www.consort-statement.org).  
5  
6  
7  
8  
9  
10  
11  
12  
13  
14  
15  
16  
17  
18  
19  
20  
21  
22  
23  
24  
25  
26  
27  
28  
29  
30  
31  
32  
33  
34  
35  
36  
37  
38  
39  
40  
41  
42

For peer review only

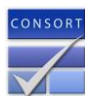

## CONSORT 2010 checklist of information to include when reporting a pilot or feasibility randomized trial in a journal or conference abstract

| Item               | Description                                                                                                 | Reported on line number                   |
|--------------------|-------------------------------------------------------------------------------------------------------------|-------------------------------------------|
| Title              | Identification of study as randomised pilot or feasibility trial                                            | Page 1, line 2                            |
| Authors *          | Contact details for the corresponding author                                                                | Page 1, lines 17-21                       |
| Trial design       | Description of pilot trial design (eg, parallel, cluster)                                                   | Page 3, line 9                            |
| Methods            |                                                                                                             |                                           |
| Participants       | Eligibility criteria for participants and the settings where the pilot trial was conducted                  | Page 3 lines 11-12 and 14-16              |
| Interventions      | Interventions intended for each group                                                                       | Page 3, lines 18-21                       |
| Objective          | Specific objectives of the pilot trial                                                                      | Page 3, lines 6-7                         |
| Outcome            | Prespecified assessment or measurement to address the pilot trial objectives**                              | Page 3, lines 23-24 and page 4, lines 1-2 |
| Randomization      | How participants were allocated to interventions                                                            | Page 9, lines 11-16                       |
| Blinding (masking) | Whether or not participants, care givers, and those assessing the outcomes were blinded to group assignment | Page 3, line 9                            |
| Results            |                                                                                                             |                                           |
| Numbers randomized | Number of participants screened and randomised to each group for the pilot trial objectives**               | Page 3, lines 14; 18-19                   |
| Recruitment        | Trial status†                                                                                               | N/A                                       |
| Numbers analysed   | Number of participants analysed in each group for the pilot objectives**                                    | Figure 1, Page 14, lines 15-20            |
| Outcome            | Results for the pilot objectives, including any expressions of uncertainty**                                | Page 3, lines 4-10                        |
| Harms              | Important adverse events or side effects                                                                    | Page 15, lines 12-13                      |
| Conclusions        | General interpretation of the results of pilot trial and their implications for the future definitive trial | Page 3, lines 12-15                       |
| Trial registration | Registration number for pilot trial and name of trial register                                              | Page 3, lines 17-18                       |
| Funding            | Source of funding for pilot trial                                                                           | Page 4, lines 10-173                      |

Citation: Eldridge SM, Chan CL, Campbell MJ, Bond CM, Hopewell S, Thabane L, et al. CONSORT 2010 statement: extension to randomised pilot and feasibility trials. *BMJ*. 2016;355.

*\*this item is specific to conference abstracts*

*\*\*Space permitting, list all pilot trial objectives and give the results for each. Otherwise, report those that are a priori agreed as the most important to the decision to proceed with the future definitive RCT.*

*†For conference abstracts.*
